# Supplementary material for: Duckweed hosts a taxonomically similar bacterial assemblage as the terrestrial leaf microbiome
Source: PLoS One. 2020 Feb 6;15(2):e0228560. doi: 10.1371/journal.pone.0228560 (PMC7004381; doi:10.1371/journal.pone.0228560)
Supplement: S11 File — ALDEx2 was used to generate a generalized linear model to determine if DAB community composition changed between host duckweed species, time points, and tissue treatments. In addition, pairwise comparisons of bacterial taxa abundance were made between LmDAB and SpDAB communities, t2 and t7 communities, and water and SD treated DAB communities. DAB t0 communities were excluded from testing. rab.win.L_minor370_DWC112 = median clr value in LmDAB communities, rab.win.S_polyrhiza432_9509 = median clr value in SpDAB communities, rab.win.2 = median clr value in t2 day DAB communities, rab.win.7 = median clr value in t7 DAB communities, rab.win.water_treated = median clr value in water treated DAB communities, rab.win.SD_treated = median clr value in salt and detergent treated DAB communities, we.eBH = expected benjamini-hochberg correct p-value of Welch’s t-test, diff.btw = median difference in clr values between factors tested, diff.win = median of largest difference in clr values within factors tested, effect = median effect size (diff.btw / diff.win). (XLSX) [file pone.0228560.s018.xlsx]

## Sheet: GLM
Phylum	Family	Genus	(Intercept) Estimate	(Intercept) Std. Error	(Intercept) t value	(Intercept) Pr(>|t|)	model.TIME7 Estimate	model.TIME7 Std. Error	model.TIME7 t value	model.TIME7 Pr(>|t|)	model.SPECIESS_polyrhiza432_9509 Estimate	model.SPECIESS_polyrhiza432_9509 Std. Error	model.SPECIESS_polyrhiza432_9509 t value	model.SPECIESS_polyrhiza432_9509 Pr(>|t|)	model.TREATMENTSD_treated Estimate	model.TREATMENTSD_treated Std. Error	model.TREATMENTSD_treated t value	model.TREATMENTSD_treated Pr(>|t|)	(Intercept) Pr(>|t|).BH	model.TIME7 Pr(>|t|).BH	model.SPECIESS_polyrhiza432_9509 Pr(>|t|).BH	model.TREATMENTSD_treated Pr(>|t|).BH
Proteobacteria	Alcaligenaceae	Achromobacter	0.181232	1.81352	0.199861	0.620473	-2.00122	1.85073	-1.19549	0.365281	-4.34152	1.85073	-2.50978	0.085338	0.409338	1.80882	0.220836	0.577711	1	0.995912	0.875102	1
Proteobacteria	Comamonadaceae	Acidovorax	9.89893	1.88202	5.40244	0.000527959	-7.07154	1.92063	-3.73121	0.00385003	-4.44684	1.92063	-2.34974	0.041085	-0.401416	1.87714	-0.215386	0.739592	0.0566145	0.441525	1	1
Proteobacteria	Moraxellaceae	Acinetobacter	6.25196	1.37441	4.55767	0.000874832	-4.21186	1.40261	-3.00666	0.0123672	2.51417	1.40261	1.79771	0.102157	-1.25627	1.37085	-0.91548	0.381789	0.0958356	0.983807	1	1
Actinobacteria	Actinomycetaceae	Actinomyces	-3.70276	1.7541	-2.17254	0.118407	-2.38942	1.79009	-1.43925	0.286395	-0.612534	1.79009	-0.363876	0.521045	1.85068	1.74955	1.16613	0.354616	0.929056	0.978486	1	0.993483
Firmicutes	Aerococcaceae	Aerococcus	-4.44205	1.69794	-2.69888	0.0568074	-1.8807	1.73277	-1.20703	0.353376	0.442855	1.73277	0.282459	0.523316	0.866876	1.69353	0.541731	0.48985	0.809054	0.976616	0.997185	1
Proteobacteria	Rhizobiaceae	Agrobacterium	8.141	0.474144	17.2582	3.56886e-09	-0.00902418	0.483871	-0.0192336	0.857477	-1.69759	0.483871	-3.52452	0.00552352	0.0161695	0.472914	0.0359431	0.856086	4.52314e-07	1	0.637653	1
Proteobacteria	Myxococcaceae	Anaeromyxobacter	-5.44531	2.01796	-2.86316	0.0553879	-1.12322	2.05936	-0.55781	0.520789	1.35418	2.05936	0.725091	0.486732	2.06049	2.01272	1.15571	0.363246	0.751878	1	1	0.992033
Proteobacteria	Xanthobacteraceae	Ancylobacter	-1.39764	1.81186	-0.743083	0.480217	-1.56399	1.84903	-0.899285	0.412655	-2.76549	1.84903	-1.61063	0.235672	-0.27989	1.80716	-0.180637	0.548043	1	0.987637	0.974887	1
Proteobacteria	Campylobacteraceae	Arcobacter	-3.49295	1.61918	-2.2333	0.122579	-2.09909	1.6524	-1.35325	0.343101	0.317387	1.6524	0.221848	0.531936	-0.486846	1.61498	-0.339062	0.517738	0.892877	0.979001	1	1
Proteobacteria	Caulobacteraceae	Asticcacaulis	-3.96187	1.65209	-2.54116	0.0681399	5.02403	1.68598	3.17282	0.0296232	2.72331	1.68598	1.80389	0.209128	-2.20176	1.6478	-1.44743	0.284152	0.866822	0.698611	0.964127	0.993274
Proteobacteria	Rhodospirillaceae	Azospirillum	3.18097	1.43907	2.4582	0.0792145	1.39916	1.46859	0.944211	0.367839	-0.709601	1.46859	-0.442995	0.66601	2.04918	1.43534	1.43961	0.180092	0.858354	1	1	1
Firmicutes	Bacillaceae	Bacillus	5.20824	0.618995	8.48199	5.77254e-06	-3.72553	0.631693	-5.94149	0.00013834	-0.873266	0.631693	-1.39575	0.208111	0.770758	0.617389	1.25925	0.253373	0.000672404	0.0181309	1	1
Proteobacteria	Bdellovibrionaceae	Bdellovibrio	-1.04273	1.3654	-0.676378	0.492989	5.31266	1.39341	4.04005	0.00497561	0.9525	1.39341	0.693235	0.481919	-3.22504	1.36185	-2.54218	0.0649488	1	0.383309	1	0.915025
Proteobacteria	Bradyrhizobiaceae	Bosea	8.11039	0.345615	23.6404	1.35002e-10	-1.3037	0.352706	-3.72147	0.00457959	-0.967186	0.352706	-2.76216	0.0228179	0.126682	0.344719	0.371379	0.706233	1.779e-08	0.466721	0.966005	1
Proteobacteria	Bradyrhizobiaceae	Bradyrhizobium	-1.95868	1.86369	-1.01199	0.375897	-2.28039	1.90192	-1.26567	0.343602	-1.35709	1.90192	-0.7488	0.506246	-1.10965	1.85885	-0.656517	0.441049	1	0.993368	1	0.994813
Proteobacteria	Caulobacteraceae	Brevundimonas	8.80741	0.758412	11.6412	1.82824e-07	-2.05098	0.773971	-2.65591	0.0236135	-2.36379	0.773971	-3.06109	0.0114489	1.83382	0.756445	2.42994	0.0351938	2.22658e-05	0.999796	0.968396	1
Proteobacteria	Burkholderiaceae	Burkholderia	-3.61247	1.26376	-2.84624	0.0287704	-1.63883	1.28969	-1.33273	0.30431	7.5099	1.28969	6.0509	0.000279055	0.929572	1.26048	0.747097	0.502644	0.823191	1	0.0364926	1
Proteobacteria	Rhodocyclaceae	C39	-0.0790316	2.32878	-0.011891	0.678202	0.672389	2.37656	0.310027	0.691107	0.333235	2.37656	0.14376	0.707967	-2.33757	2.32274	-1.02057	0.368228	1	1	1	1
Proteobacteria	Francisellaceae	Caedibacter	-6.97138	2.41075	-2.97551	0.0246799	5.62705	2.4602	2.40046	0.0748605	-0.950167	2.4602	-0.393755	0.617667	5.9506	2.40449	2.55794	0.0519899	0.779411	0.938561	1	0.922175
Bacteroidetes	[Amoebophilaceae]	Candidatus Amoebophilus	-4.21606	1.71043	-2.60336	0.0793911	-0.411078	1.74552	-0.244468	0.496199	0.163566	1.74552	0.120931	0.553244	-0.53708	1.70599	-0.343812	0.486464	0.822822	1	1	1
Chlamydiae	Parachlamydiaceae	Candidatus Protochlamydia	-4.82941	1.68071	-3.10141	0.0419035	-0.447096	1.71518	-0.268514	0.523342	0.0685864	1.71518	0.0784364	0.522556	0.923167	1.67635	0.617528	0.488775	0.690815	1	1	0.998001
Bacteroidetes	Flavobacteriaceae	Capnocytophaga	-4.44035	1.58739	-2.99031	0.0582149	-1.74458	1.61995	-1.21801	0.379891	0.442343	1.61995	0.290878	0.475479	0.719767	1.58327	0.518431	0.477407	0.69027	0.957159	0.996335	1
Proteobacteria	Caulobacteraceae	Caulobacter	10.8402	0.385975	28.354	2.16305e-11	0.712211	0.393894	1.82365	0.107347	-1.79354	0.393894	-4.59839	0.0010777	0.12479	0.384974	0.328809	0.738644	2.89333e-09	1	0.140828	1
Proteobacteria	Alteromonadaceae	Cellvibrio	8.84735	0.548053	16.1947	6.10462e-09	0.660404	0.559296	1.18522	0.270279	3.05726	0.559296	5.48452	0.000222571	-0.43999	0.546631	-0.808748	0.445517	7.69735e-07	1	0.0298672	1
Bacteroidetes	[Weeksellaceae]	Chryseobacterium	1.10703	2.34395	0.530645	0.591468	-3.69158	2.39203	-1.61469	0.211884	-2.10279	2.39203	-0.892106	0.418819	-1.14081	2.33787	-0.497158	0.589116	1	0.991561	1	1
Proteobacteria	Comamonadaceae	Comamonas	7.5275	2.51039	3.10765	0.0187924	-4.53883	2.56189	-1.82125	0.126884	-4.10455	2.56189	-1.63985	0.154453	-2.84264	2.50388	-1.15226	0.30316	0.726491	1	1	1
Actinobacteria	Corynebacteriaceae	Corynebacterium	0.738498	2.12747	0.395604	0.64142	-4.3959	2.17111	-2.12853	0.103516	-2.31149	2.17111	-1.06704	0.352694	1.60481	2.12195	0.780681	0.482684	1	0.984359	1	1
Proteobacteria	Crenotrichaceae	Crenothrix	-4.52237	1.67567	-2.82781	0.0575284	-1.0836	1.71005	-0.668801	0.492816	0.766762	1.71005	0.501648	0.473058	0.595877	1.67133	0.332573	0.524498	0.762679	1	1	0.99955
Actinobacteria	Microbacteriaceae	Cryocola	-5.27463	1.74797	-3.16963	0.0303066	-0.231286	1.78383	-0.082202	0.538962	0.438285	1.78383	0.267904	0.562984	1.23958	1.74343	0.757058	0.467216	0.695612	1	1	0.996596
Proteobacteria	Oxalobacteraceae	Cupriavidus	-2.90079	2.0111	-1.44496	0.250603	-2.22005	2.05236	-1.15418	0.369143	-1.97689	2.05236	-1.03536	0.370581	1.59225	2.00588	0.856356	0.485036	0.992276	0.991898	0.999487	0.997932
Proteobacteria	Comamonadaceae	Curvibacter	6.36742	1.75227	3.76562	0.00871594	5.63954	1.78822	3.17642	0.0100155	-8.64842	1.78822	-4.90925	0.00065024	-0.451986	1.74773	-0.264593	0.683108	0.440302	0.842369	0.0855499	1
Bacteroidetes	Cytophagaceae	Cytophaga	2.26749	2.41633	1.00355	0.369516	5.2387	2.4659	2.13944	0.0574366	-0.723804	2.4659	-0.290838	0.690959	-3.25007	2.41006	-1.37224	0.227561	1	1	1	1
Proteobacteria	Rhodocyclaceae	Dechloromonas	1.55188	1.22663	1.48732	0.264836	-5.06157	1.25179	-4.29041	0.00757355	6.00916	1.25179	5.00102	0.0010383	-1.04495	1.22345	-0.869208	0.434803	0.979202	0.315536	0.114337	1
Proteobacteria	Hyphomicrobiaceae	Devosia	10.8584	1.00237	10.8605	3.77494e-07	0.379889	1.02294	0.370455	0.719713	-3.00661	1.02294	-2.94456	0.0137948	1.02648	0.999774	1.02787	0.328915	4.5364e-05	1	0.998933	1
Proteobacteria	Xanthomonadaceae	Dokdonella	-4.34045	2.10665	-2.10323	0.106936	-0.112096	2.14987	-0.0443441	0.617341	2.27717	2.14987	1.11376	0.358922	-0.646511	2.10119	-0.307788	0.606374	0.964964	1	0.989399	1
Bacteroidetes	Cytophagaceae	Emticicia	5.92421	0.800936	7.45583	1.9867e-05	2.56192	0.817367	3.15061	0.0102291	-0.685834	0.817367	-0.847316	0.426108	-1.99145	0.798858	-2.50419	0.0312762	0.0022984	0.873841	1	1
Proteobacteria	Moraxellaceae	Enhydrobacter	-3.63769	1.76888	-2.17125	0.135535	-2.80558	1.80517	-1.62843	0.262015	-0.0138256	1.80517	0.00121679	0.551574	1.65947	1.76429	1.05281	0.382486	0.895427	0.960684	0.998923	0.987944
Proteobacteria	Enterobacteriaceae	Enterobacter	-3.44519	1.63013	-2.20168	0.113947	-1.92002	1.66358	-1.28085	0.334454	-1.13953	1.66358	-0.763848	0.454708	1.01041	1.6259	0.718656	0.429733	0.914888	0.961569	0.998702	1
Proteobacteria	Enterobacteriaceae	Erwinia	0.880134	2.20794	0.479902	0.589495	-5.72974	2.25324	-2.66136	0.0472533	-0.160634	2.25324	-0.0868455	0.734264	2.80863	2.20221	1.31636	0.255136	1	0.897933	1	1
Armatimonadetes	[Fimbriimonadaceae]	Fimbriimonas	-5.46753	1.96981	-2.8716	0.0418127	0.307688	2.01022	0.166024	0.538555	0.582185	2.01022	0.303197	0.546802	1.48204	1.9647	0.823969	0.45777	0.783732	1	1	0.995736
Firmicutes	[Tissierellaceae]	Finegoldia	-4.53082	1.93455	-2.4311	0.0829562	-1.24352	1.97424	-0.693292	0.476957	-0.0809799	1.97424	-0.044462	0.565663	1.50893	1.92953	0.854291	0.468461	0.890799	1	1	0.999211
Bacteroidetes	Flavobacteriaceae	Flavobacterium	9.78234	0.714531	13.7203	3.31636e-08	0.680706	0.729189	0.93658	0.375151	-1.39559	0.729189	-1.91807	0.0840806	-1.39576	0.712677	-1.96305	0.0789293	4.11363e-06	1	1	1
Bacteroidetes	Cytophagaceae	Flectobacillus	3.75678	1.64251	2.46303	0.0626882	3.56496	1.67621	2.19391	0.0567799	1.63923	1.67621	1.04371	0.362894	-3.71088	1.63825	-2.33111	0.0452704	0.894576	1	1	1
Bacteroidetes	Cryomorphaceae	Fluviicola	2.03935	1.46804	1.52625	0.221925	7.22419	1.49815	5.00104	0.00107814	3.2201	1.49815	2.15678	0.0562336	-2.37815	1.46423	-1.62474	0.136201	1	0.112286	1	1
Fusobacteria	Fusobacteriaceae	Fusobacterium	-3.37786	1.73362	-2.04546	0.15695	-2.08948	1.76919	-1.27655	0.318636	-1.30056	1.76919	-0.793272	0.415674	1.01644	1.72912	0.69676	0.461433	0.925382	0.965721	1	0.992028
Planctomycetes	Gemmataceae	Gemmata	-2.3438	1.50908	-1.56773	0.203124	6.49295	1.54004	4.39978	0.0023234	0.648417	1.54004	0.494465	0.539651	-1.89803	1.50516	-1.33339	0.298368	0.998813	0.25975	1	0.998375
Gemmatimonadetes	Gemmatimonadaceae	Gemmatimonas	0.639083	1.68545	0.437801	0.636159	3.56688	1.72003	2.15864	0.0863545	2.6978	1.72003	1.59829	0.194213	-4.42572	1.68108	-2.65869	0.0259921	1	0.989737	1	0.995668
Acidobacteria	Holophagaceae	Geothrix	-3.35316	1.71086	-2.0155	0.148217	-2.28239	1.74595	-1.37509	0.317796	0.658374	1.74595	0.426913	0.533024	-0.772808	1.70642	-0.484621	0.484122	0.949257	0.981721	0.998136	0.9939
Actinobacteria	Gordoniaceae	Gordonia	3.28017	2.68155	1.26818	0.255723	-4.04602	2.73657	-1.51099	0.179032	1.87719	2.73657	0.702219	0.515288	-0.0541024	2.6746	-0.0155825	0.841722	1	1	1	1
Firmicutes	Carnobacteriaceae	Granulicatella	-3.69449	1.67974	-2.31702	0.116725	-1.8353	1.7142	-1.11777	0.345979	-1.00965	1.7142	-0.622303	0.403199	0.918097	1.67538	0.621066	0.449409	0.86309	0.992947	0.998681	1
Proteobacteria	Pasteurellaceae	Haemophilus	-2.41129	2.05904	-1.16124	0.350124	-3.45587	2.10128	-1.79473	0.19539	-1.89942	2.10128	-0.986756	0.389056	3.0283	2.0537	1.59827	0.246434	0.996446	0.954018	0.995864	0.980974
Proteobacteria	Halomonadaceae	Halomonas	-2.9318	1.71364	-1.74071	0.170068	-2.54945	1.7488	-1.58165	0.25679	-0.324683	1.7488	-0.212109	0.562668	0.348725	1.7092	0.19539	0.561245	0.992026	0.96448	1	1
Proteobacteria	Comamonadaceae	Hydrogenophaga	9.00077	0.87102	10.3471	5.65613e-07	0.805776	0.888889	0.907994	0.387451	-2.55037	0.888889	-2.87187	0.0156387	-1.02755	0.868761	-1.18455	0.265553	6.74293e-05	1	0.999244	1
Proteobacteria	Rhodocyclaceae	Hydrogenophilus	-4.22962	1.76061	-2.51846	0.0858705	-0.628473	1.79673	-0.35179	0.48936	0.244779	1.79673	0.157287	0.492232	-0.379448	1.75604	-0.257396	0.511358	0.852436	0.999024	0.994271	1
Proteobacteria	Hyphomicrobiaceae	Hyphomicrobium	2.90576	1.88808	1.68475	0.17469	5.58237	1.92682	2.99029	0.015612	-1.31367	1.92682	-0.681552	0.516052	-1.8019	1.88319	-1.01466	0.359689	0.997747	0.907672	1	1
Proteobacteria	Rhodospirillaceae	Inquilinus	-5.09992	1.77395	-3.02607	0.0402586	-0.301568	1.81034	-0.154573	0.55175	0.538314	1.81034	0.294758	0.52217	0.918732	1.76935	0.626706	0.444333	0.70983	1	1	0.993165
Proteobacteria	Oxalobacteraceae	Janthinobacterium	11.402	0.554217	20.6471	4.67626e-10	-4.24219	0.565587	-7.52836	1.40605e-05	-0.693435	0.565587	-1.23129	0.251602	-0.0376472	0.552779	-0.0678551	0.869456	6.05725e-08	0.00191346	1	1
Proteobacteria	Rhizobiaceae	Kaistia	-3.27281	1.43277	-2.37443	0.0950009	6.62654	1.46216	4.83638	0.00219461	2.02276	1.46216	1.50165	0.295222	-1.39211	1.42905	-1.02893	0.372624	0.893326	0.185091	0.986636	1
Actinobacteria	Micrococcaceae	Kocuria	-3.39124	1.87374	-1.86168	0.166949	-1.90576	1.91217	-1.07425	0.388695	-1.51137	1.91217	-0.83686	0.442779	1.45142	1.86887	0.848553	0.433521	0.968133	0.986406	0.997381	1
Firmicutes	Lactobacillaceae	Lactobacillus	-3.72524	1.84328	-2.07095	0.131105	-2.2171	1.88109	-1.26942	0.336181	-0.522559	1.88109	-0.324054	0.526349	1.62893	1.83849	0.970293	0.417414	0.925755	0.983325	1	1
Bacteroidetes	Cytophagaceae	Leadbetterella	-5.66419	1.67479	-3.51118	0.015074	2.7896	1.70915	1.72914	0.200089	2.33169	1.70915	1.45905	0.262526	0.0900788	1.67044	0.013721	0.616141	0.566064	0.977797	0.985922	1
Proteobacteria	Legionellaceae	Legionella	-5.45749	1.80556	-3.16112	0.0321878	0.0408905	1.8426	0.0186522	0.542392	0.731189	1.8426	0.450096	0.509404	1.19422	1.80087	0.723141	0.454035	0.669519	1	1	0.992719
Proteobacteria	Comamonadaceae	Limnohabitans	11.0286	0.509151	21.7401	2.76354e-10	-1.04734	0.519596	-2.025	0.0741395	-1.48566	0.519596	-2.8686	0.0167007	0.581291	0.50783	1.14848	0.285726	3.60786e-08	1	0.990019	1
Proteobacteria	Xanthomonadaceae	Luteibacter	1.8296	2.15292	0.894618	0.433244	-2.4846	2.19709	-1.12514	0.330965	-4.91067	2.19709	-2.29264	0.0705503	2.35127	2.14734	1.12012	0.336473	1	1	0.991883	1
Verrucomicrobia	Verrucomicrobiaceae	Luteolibacter	-3.41026	1.7622	-1.96873	0.134653	3.03739	1.79836	1.81613	0.173858	-1.79729	1.79836	-1.12431	0.37551	0.225258	1.75763	0.111986	0.581615	0.956597	0.976376	0.988273	1
Firmicutes	Planococcaceae	Lysinibacillus	-3.36749	1.92354	-1.78836	0.183109	-1.86789	1.963	-1.00373	0.419546	-1.60328	1.963	-0.859436	0.45733	1.34316	1.91855	0.767541	0.456769	0.964189	1	0.99472	0.999947
Proteobacteria	Phyllobacteriaceae	Mesorhizobium	12.588	0.441671	28.647	1.53879e-11	-1.72584	0.450731	-3.84945	0.00330762	-1.77488	0.450731	-3.95797	0.00267487	0.677379	0.440525	1.54561	0.162111	2.06727e-09	0.386679	0.34221	1
Proteobacteria	Comamonadaceae	Methylibium	3.52787	1.5134	2.62793	0.0837321	2.43311	1.54445	1.62112	0.13879	4.18484	1.54445	2.77178	0.0200358	-3.68572	1.50947	-2.51031	0.032365	0.798775	1	0.999617	1
Proteobacteria	Methylobacteriaceae	Methylobacterium	-1.4308	2.62006	-0.526979	0.587097	3.08543	2.67381	1.19992	0.317674	-0.792848	2.67381	-0.303664	0.645965	-2.96914	2.61326	-1.16728	0.321929	1	1	1	1
Proteobacteria	Piscirickettsiaceae	Methylophaga	-4.36211	1.85568	-2.48971	0.0816633	-2.21126	1.89375	-1.24762	0.347562	0.280252	1.89375	0.195049	0.553204	1.08324	1.85087	0.659362	0.470148	0.851454	0.972439	1	1
Proteobacteria	Methylophilaceae	Methylotenera	-0.934682	2.09642	-0.38957	0.61189	-2.92582	2.13943	-1.43057	0.277587	-2.65728	2.13943	-1.32192	0.291357	0.159391	2.09099	0.0735353	0.603652	1	0.988924	0.993622	1
Proteobacteria	Rhodocyclaceae	Methyloversatilis	-3.66421	1.92379	-1.89156	0.123457	6.96492	1.96325	3.62031	0.00538575	3.86941	1.96325	2.044	0.104079	0.132029	1.9188	0.0571787	0.716198	0.996077	0.513843	0.997318	1
Actinobacteria	Geodermatophilaceae	Modestobacter	-4.65825	2.03358	-2.40883	0.0761009	-2.54731	2.0753	-1.29121	0.320155	1.12568	2.0753	0.588322	0.530984	1.36927	2.0283	0.771502	0.485764	0.886404	0.994102	1	1
Actinobacteria	Mycobacteriaceae	Mycobacterium	-0.132945	2.41745	-0.0153359	0.729324	-3.98244	2.46705	-1.66866	0.18593	0.332554	2.46705	0.147531	0.654889	-1.2876	2.41118	-0.549624	0.561256	1	0.996136	1	1
Proteobacteria	Caulobacteraceae	Mycoplana	9.04172	0.574963	15.7859	8.54986e-09	0.282961	0.586758	0.481705	0.64482	0.880693	0.586758	1.50488	0.165926	-1.34656	0.573471	-2.35574	0.0413313	1.07445e-06	1	1	1
Proteobacteria	Sinobacteraceae	Nevskia	4.61721	1.3076	3.74999	0.0142196	1.72071	1.33443	1.31164	0.219955	2.82778	1.33443	2.14832	0.0571186	-3.16842	1.30421	-2.48443	0.0339452	0.468061	1	1	1
Nitrospirae	Nitrospiraceae	Nitrospira	-6.75491	1.80288	-3.93987	0.0113416	2.7952	1.83986	1.6297	0.207235	3.4393	1.83986	1.96085	0.158013	2.20363	1.7982	1.3598	0.317531	0.451423	0.985906	0.948766	0.994274
Proteobacteria	Sphingomonadaceae	Novosphingobium	2.14427	1.6613	1.45948	0.271045	3.92955	1.69538	2.39889	0.0419169	0.451292	1.69538	0.257574	0.755377	-0.526428	1.65699	-0.364839	0.683516	0.989771	0.995945	1	1
Verrucomicrobia	Opitutaceae	Opitutus	-0.0803409	1.28595	0.0115543	0.690576	4.98115	1.31233	3.99968	0.00461734	2.98782	1.31233	2.41187	0.0697778	-2.44022	1.28261	-1.93275	0.0914723	1	0.392672	0.955685	1
Firmicutes	Paenibacillaceae	Paenibacillus	-0.165709	2.01902	-0.0429014	0.694159	-1.34899	2.06044	-0.701923	0.497639	-3.00472	2.06044	-1.51807	0.216889	-0.407988	2.01378	-0.193593	0.603181	1	1	1	1
Proteobacteria	Rhodobacteraceae	Paracoccus	-3.44918	1.96451	-1.77188	0.151223	-0.9324	2.00481	-0.474496	0.536704	-0.408137	2.00481	-0.21765	0.55594	0.215413	1.95942	0.116189	0.575114	0.994247	1	1	1
Proteobacteria	Hyphomicrobiaceae	Parvibaculum	-2.96945	1.49686	-2.05003	0.103031	2.7427	1.52757	1.88223	0.150122	0.183819	1.52757	0.0901489	0.556453	-1.61062	1.49298	-1.12127	0.365666	0.969423	0.975934	1	0.996002
Bacteroidetes	Sphingobacteriaceae	Pedobacter	-2.35088	2.02519	-1.17145	0.339998	2.50036	2.06674	1.26012	0.305692	-4.49407	2.06674	-2.28033	0.0901311	2.92356	2.01994	1.54638	0.241857	1	1	0.943774	0.993446
Proteobacteria	Hyphomicrobiaceae	Pedomicrobium	-4.28779	1.61166	-2.75016	0.0453627	4.12643	1.64472	2.64358	0.0548838	2.08843	1.64472	1.31712	0.319048	-1.00325	1.60747	-0.63286	0.515199	0.816281	0.882084	0.988803	1
Verrucomicrobia	[Pedosphaeraceae]	Pedosphaera	-8.07211	2.6215	-3.12061	0.0179839	3.53054	2.67528	1.3635	0.275525	2.37155	2.67528	0.893478	0.436825	4.09848	2.6147	1.61275	0.204599	0.726665	1	1	0.995078
Proteobacteria	Moraxellaceae	Perlucidibaca	7.78044	1.74573	4.53803	0.00128498	-3.25826	1.78154	-1.84027	0.0943151	0.775053	1.78154	0.464338	0.656282	-2.69439	1.7412	-1.55857	0.149299	0.134268	1	1	1
Proteobacteria	Rhodospirillaceae	Phaeospirillum	-3.62951	1.71598	-2.18002	0.120234	1.17711	1.75118	0.743789	0.441597	-0.398072	1.75118	-0.306193	0.539645	-0.857144	1.71153	-0.525232	0.511203	0.918098	1	1	1
Proteobacteria	Caulobacteraceae	Phenylobacterium	7.11585	0.458974	15.5766	1.02228e-08	0.276799	0.46839	0.592237	0.575498	-0.00118577	0.46839	-0.00341368	0.872861	0.0030089	0.457784	0.0075923	0.848632	1.28152e-06	1	1	1
Cyanobacteria	Phormidiaceae	Phormidium	-6.27021	2.67574	-2.3902	0.0570938	0.361994	2.73063	0.149031	0.691719	4.30548	2.73063	1.63413	0.191902	2.95812	2.6688	1.14162	0.329321	0.940069	1	0.991283	1
Actinobacteria	Intrasporangiaceae	Phycicoccus	-5.25763	1.88307	-2.88991	0.0369084	-0.0549792	1.9217	-0.0368937	0.584918	0.345161	1.9217	0.219839	0.53689	1.41939	1.87819	0.794897	0.482668	0.777275	1	1	1
Proteobacteria	Phyllobacteriaceae	Phyllobacterium	-1.06359	2.19881	-0.431198	0.621936	-0.152492	2.24392	-0.0585656	0.664297	-3.0491	2.24392	-1.41195	0.24992	0.366218	2.19311	0.129519	0.644812	1	1	1	1
Planctomycetes	Pirellulaceae	Pirellula	-3.79025	1.94275	-2.01914	0.128517	1.94402	1.98261	1.05149	0.386417	0.107134	1.98261	0.092497	0.577431	-0.886177	1.93771	-0.490335	0.534239	0.961007	1	1	1
Planctomycetes	Planctomycetaceae	Planctomyces	-1.44243	1.66181	-0.83644	0.452046	7.62649	1.6959	4.64891	0.00131393	0.636341	1.6959	0.420826	0.597163	-1.52394	1.6575	-0.961902	0.412998	1	0.159303	1	1
Proteobacteria	Comamonadaceae	Polaromonas	1.21771	2.12338	0.612315	0.544327	4.33222	2.16694	2.13773	0.116627	-4.78318	2.16694	-2.32192	0.084148	-2.28945	2.11787	-1.10959	0.350959	1	0.961495	0.930334	1
Proteobacteria	Oxalobacteraceae	Polynucleobacter	6.28517	0.659161	9.56595	1.39254e-06	0.077067	0.672684	0.115951	0.866207	-1.81192	0.672684	-2.70084	0.0222833	-0.514979	0.657451	-0.784727	0.457962	0.000164029	1	0.998845	1
Bacteroidetes	Cytophagaceae	Pontibacter	-4.92538	1.6573	-3.15452	0.03338	-0.721403	1.6913	-0.437983	0.502047	0.138837	1.6913	0.0884312	0.545763	0.94708	1.653	0.628905	0.479605	0.689373	1	0.999142	1
Bacteroidetes	[Paraprevotellaceae]	[Prevotella]	-2.75063	1.63249	-1.71548	0.191832	-1.81135	1.66598	-1.23381	0.369714	-0.936631	1.66598	-0.579122	0.45885	-0.699673	1.62825	-0.452407	0.491292	0.971652	0.958765	0.996995	1
Proteobacteria	Rhodocyclaceae	Propionivibrio	-4.72866	2.01348	-2.39422	0.0740702	-1.13384	2.05479	-0.564132	0.530145	1.60288	2.05479	0.824315	0.480107	0.202395	2.00826	0.0775388	0.579777	0.91299	1	0.997004	1
Verrucomicrobia	Verrucomicrobiaceae	Prosthecobacter	1.06173	1.00462	1.42413	0.320204	3.19313	1.02523	3.4212	0.0148287	4.77067	1.02523	5.04316	0.00148854	-2.9315	1.00201	-3.12693	0.0161315	0.95569	0.620066	0.17558	0.817556
Cyanobacteria	Pseudanabaenaceae	Pseudanabaena	-6.70002	2.03666	-3.37954	0.015948	2.69633	2.07844	1.37062	0.294154	2.42338	2.07844	1.23566	0.338278	2.00411	2.03138	0.992907	0.381371	0.63891	1	0.993242	0.999092
Proteobacteria	Pseudomonadaceae	Pseudomonas	14.4923	0.42096	34.601	1.91162e-12	-3.05369	0.429596	-7.14421	2.48106e-05	0.317763	0.429596	0.744187	0.483662	-0.346626	0.419868	-0.831012	0.439773	2.59803e-10	0.00333715	1	1
Actinobacteria	Pseudonocardiaceae	Pseudonocardia	-3.74503	1.72721	-2.28466	0.110862	-2.13384	1.76264	-1.36564	0.336289	0.697466	1.76264	0.491229	0.512285	-0.603751	1.72273	-0.360709	0.49922	0.880918	0.970414	0.986588	1
Proteobacteria	Xanthomonadaceae	Pseudoxanthomonas	7.31131	0.672129	10.9194	3.81854e-07	0.055371	0.685918	0.0802589	0.883033	-2.09529	0.685918	-3.06527	0.0116891	-0.108605	0.670385	-0.162401	0.845957	4.58424e-05	1	0.943815	1
Proteobacteria	[Chromatiaceae]	Rheinheimera	13.3996	0.365424	36.8877	1.01174e-12	-2.75421	0.372921	-7.43439	1.92465e-05	-1.34597	0.372921	-3.63143	0.00486586	0.372597	0.364476	1.02807	0.346676	1.38231e-10	0.00259142	0.566471	1
Proteobacteria	Rhodobacteraceae	Rhodobacter	8.35013	0.73627	11.3648	2.32532e-07	1.24462	0.751374	1.65886	0.128683	0.046058	0.751374	0.0619972	0.904925	-0.853998	0.73436	-1.16574	0.273995	2.82533e-05	1	1	1
Actinobacteria	Nocardiaceae	Rhodococcus	-4.5328	1.90359	-2.46377	0.070793	-2.36708	1.94264	-1.26945	0.320647	0.564794	1.94264	0.322061	0.568384	1.41899	1.89865	0.80592	0.453845	0.868022	0.989679	1	1
Proteobacteria	Comamonadaceae	Rhodoferax	9.81175	0.448196	22.0085	2.64355e-10	-1.63114	0.457391	-3.58776	0.00529081	-0.959084	0.457391	-2.10679	0.0640132	-0.71376	0.447034	-1.60311	0.147834	3.45521e-08	0.552542	1	1
Proteobacteria	Hyphomicrobiaceae	Rhodoplanes	-2.26192	1.5528	-1.40727	0.238373	7.09786	1.58466	4.70338	0.00182719	-1.02945	1.58466	-0.719964	0.470872	-1.34513	1.54877	-0.989996	0.408957	1	0.195987	1	0.99945
Proteobacteria	Rickettsiaceae	Rickettsia	-2.62612	2.10944	-1.23759	0.314237	3.22431	2.15271	1.55946	0.202393	-2.94031	2.15271	-1.45321	0.238651	2.21014	2.10397	1.10536	0.358653	0.999944	0.999317	0.9952	1
Proteobacteria	Acetobacteraceae	Roseococcus	-1.9877	1.39315	-1.45362	0.231772	6.7882	1.42173	5.12936	0.00132561	-0.777234	1.42173	-0.568647	0.523141	-0.404823	1.38953	-0.294289	0.580495	0.996498	0.145355	1	1
Actinobacteria	Micrococcaceae	Rothia	-3.67265	1.8908	-1.94678	0.145376	-3.11661	1.92959	-1.78713	0.228589	-0.0679634	1.92959	-0.0768256	0.575815	2.78367	1.8859	1.56687	0.243145	0.976281	0.938616	1	0.994911
Proteobacteria	Comamonadaceae	Rubrivivax	4.77103	1.14502	4.71525	0.0151797	0.790843	1.16851	0.678916	0.514371	3.05084	1.16851	2.73602	0.0242946	-2.88887	1.14205	-2.67306	0.029102	0.272867	1	0.984708	0.979936
Firmicutes	Ruminococcaceae	Ruminococcus	-3.34565	1.56092	-2.20655	0.105406	-1.52004	1.59294	-1.02484	0.412934	-0.848148	1.59294	-0.607263	0.465341	-0.179937	1.55687	-0.129761	0.477383	0.922105	0.979735	0.997001	1
Bacteroidetes	Cytophagaceae	Runella	4.4164	1.55103	3.03152	0.0255044	-6.26635	1.58285	-4.07445	0.00272777	1.94552	1.58285	1.2743	0.268426	0.27587	1.54701	0.182354	0.726916	0.730228	0.314122	1	1
Actinobacteria	Microbacteriaceae	Salinibacterium	2.3872	1.77865	1.43506	0.21629	-0.392902	1.81514	-0.240286	0.736385	3.07415	1.81514	1.74146	0.141434	-3.02988	1.77404	-1.71377	0.118837	1	1	1	1
Firmicutes	Staphylococcaceae	Salinicoccus	-3.32188	1.71682	-1.98323	0.128639	-1.72873	1.75205	-1.12507	0.34856	-0.885718	1.75205	-0.539309	0.478252	-0.154221	1.71237	-0.150959	0.558901	0.970874	0.981334	0.999561	1
Bacteroidetes	[Amoebophilaceae]	SC3-56	-6.01814	1.73397	-3.67327	0.0153209	0.880677	1.76954	0.596763	0.477925	1.1019	1.76954	0.651527	0.455233	2.0772	1.72947	1.28896	0.325163	0.528146	1	1	0.990668
Bacteroidetes	Chitinophagaceae	Sediminibacterium	4.79041	1.50077	3.37258	0.0174672	2.05784	1.53156	1.37132	0.202398	3.92906	1.53156	2.61229	0.0264992	-2.84346	1.49688	-1.93062	0.0831566	0.612282	1	0.999714	1
SAR406	A714017	SGSH944	-4.52384	1.79922	-2.66312	0.0608636	-2.28226	1.83613	-1.31536	0.323121	0.59065	1.83613	0.405742	0.512347	1.13292	1.79455	0.681539	0.43555	0.806166	0.986142	1	1
Proteobacteria	Shewanellaceae	Shewanella	-2.05556	1.69277	-1.21605	0.329644	-2.43922	1.7275	-1.52666	0.296861	-1.85279	1.7275	-1.13377	0.362015	0.230617	1.68838	0.123519	0.494821	1	0.966668	1	1
Proteobacteria	Sphingomonadaceae	Sphingobium	0.190846	1.31413	0.299897	0.602154	4.07839	1.34109	3.16836	0.0133558	3.54216	1.34109	2.69879	0.0234737	-0.23424	1.31073	-0.192093	0.723659	1	0.763405	0.991549	1
Proteobacteria	Sphingomonadaceae	Sphingomonas	6.63956	0.325048	20.6392	6.92109e-10	1.15552	0.331716	3.52257	0.00692873	0.21319	0.331716	0.652487	0.549431	-0.317542	0.324205	-0.986224	0.373915	8.93036e-08	0.608885	1	1
Proteobacteria	Sphingomonadaceae	Sphingopyxis	-2.06519	1.59697	-1.2601	0.29698	9.89441	1.62973	6.40552	0.000230215	-1.55933	1.62973	-1.04677	0.382126	-0.113504	1.59283	-0.0808283	0.668884	1	0.0290731	1	1
Spirochaetes	Spirochaetaceae	Spirochaeta	-5.00426	1.75754	-2.98428	0.0404662	-0.470824	1.79359	-0.272457	0.528058	0.398121	1.79359	0.257155	0.533199	1.11084	1.75298	0.678179	0.459698	0.750017	1	0.997445	1
Firmicutes	Staphylococcaceae	Staphylococcus	4.86149	1.53889	3.29253	0.0131441	-7.90301	1.57046	-5.16231	0.000568892	-1.02792	1.57046	-0.651193	0.523707	0.790575	1.5349	0.559046	0.572822	0.636671	0.0701512	1	1
Proteobacteria	Xanthomonadaceae	Stenotrophomonas	2.2534	2.57583	0.914635	0.407001	-3.00539	2.62867	-1.15634	0.301814	-2.98722	2.62867	-1.14969	0.295031	3.03306	2.56915	1.19966	0.276595	1	1	1	1
Proteobacteria	Sinobacteraceae	Steroidobacter	-4.4888	1.99784	-2.28799	0.0709526	2.48286	2.03882	1.26698	0.290206	0.402242	2.03882	0.190764	0.635041	1.19486	1.99265	0.637325	0.497757	0.948691	1	1	1
Firmicutes	Streptococcaceae	Streptococcus	-2.74547	2.27516	-1.20726	0.306032	-1.69788	2.32183	-0.763949	0.481907	1.34778	2.32183	0.594841	0.577686	2.45584	2.26925	1.13389	0.33405	1	1	1	1
Actinobacteria	Streptomycetaceae	Streptomyces	-4.45646	1.71502	-2.72608	0.0441961	-1.8272	1.75021	-1.19399	0.379433	0.409429	1.75021	0.276247	0.52508	1.10479	1.71057	0.738746	0.439883	0.839625	0.98684	0.9938	0.994394
Proteobacteria	Rhodocyclaceae	Sulfuritalea	-5.26153	1.657	-3.38813	0.026835	-0.2562	1.691	-0.161932	0.547355	0.296613	1.691	0.247769	0.508366	1.32152	1.65271	0.879738	0.423815	0.63261	1	0.992511	0.990884
Actinobacteria	Intrasporangiaceae	Terracoccus	-4.69227	1.82822	-2.70104	0.0706449	-2.10682	1.86573	-1.23787	0.378262	0.832565	1.86573	0.502132	0.517369	1.15145	1.82348	0.704419	0.470875	0.79562	0.96962	1	0.992138
Proteobacteria	Rhodocyclaceae	Thauera	-3.51794	1.80393	-1.97298	0.126766	-2.39103	1.84094	-1.38465	0.31413	1.07754	1.84094	0.630236	0.519425	-0.744905	1.79925	-0.474639	0.563345	0.971269	0.973793	0.996966	1
Proteobacteria	Xanthomonadaceae	Thermomonas	-3.81639	2.41335	-1.58069	0.17665	-0.023722	2.46286	0.00277102	0.652867	0.781046	2.46286	0.328858	0.652144	0.681156	2.40709	0.26477	0.634991	0.997227	1	1	1
Actinobacteria	Tsukamurellaceae	Tsukamurella	-2.4885	1.6867	-1.51807	0.237166	-1.97038	1.7213	-1.2363	0.357328	-1.33052	1.7213	-0.836525	0.422801	-0.634289	1.68232	-0.382471	0.50935	0.98589	0.978302	0.989672	0.993608
Firmicutes	Veillonellaceae	Veillonella	-4.45678	1.70339	-2.79294	0.0608035	-1.89329	1.73833	-1.24704	0.344399	0.362399	1.73833	0.273408	0.51032	0.860783	1.69897	0.557928	0.472011	0.771335	0.959703	1	1
Proteobacteria	Xanthobacteraceae	Xanthobacter	3.30923	1.5546	2.28463	0.0770317	1.19164	1.58649	0.813183	0.471616	-7.00133	1.58649	-4.66083	0.0020501	-1.17331	1.55056	-0.750249	0.474749	0.946918	1	0.230856	1
Proteobacteria	Rhodocyclaceae	Zoogloea	-0.319966	1.7249	-0.0641179	0.646457	0.308995	1.76029	0.154158	0.726259	9.3001	1.76029	5.45718	0.00050234	-2.77379	1.72043	-1.68281	0.168506	1	1	0.0591729	1

## Sheet: LmDAB_vs_SpDAB
Phylum	Family	Genus	we.ep	we.eBH	wi.ep	wi.eBH	rab.all	rab.win.L_minor370_DWC112	rab.win.S_polyrhiza432_9509	diff.btw	diff.win	effect	overlap	absolute_effect
Proteobacteria	Alcaligenaceae	[Prevotella]	0.476545	0.707816	0.510502	0.726321	-3.91152	-3.23317	-4.29524	-1.37518	4.72298	-0.24778	0.388021	0.24778
Proteobacteria	Comamonadaceae	Achromobacter	0.0546079	0.236822	0.0459103	0.210809	-3.26515	0.247299	-4.63228	-5.31951	5.205	-0.931002	0.158855	0.931002
Proteobacteria	Moraxellaceae	Acidovorax	0.0374168	0.242957	0.057967	0.26912	6.40275	7.36341	5.53465	-2.56886	4.4276	-0.628436	0.177084	0.628436
Actinobacteria	Actinomycetaceae	Acinetobacter	0.205581	0.532916	0.183816	0.495907	5.18663	4.50333	7.83634	2.98806	3.33715	0.618384	0.290909	0.618384
Firmicutes	Aerococcaceae	Actinomyces	0.528044	0.751058	0.581681	0.776766	-3.72656	-3.15677	-3.99508	-0.886152	5.0998	-0.16151	0.416667	0.16151
Proteobacteria	Rhizobiaceae	Aerococcus	0.558156	0.776516	0.594602	0.790505	-4.06735	-4.25628	-3.96937	0.40784	4.68775	0.0840816	0.460938	0.0840816
Proteobacteria	Myxococcaceae	Agrobacterium	0.00463739	0.0874759	0.00356206	0.0503958	7.0538	8.16367	6.67192	-1.75	1.33121	-1.29308	0.049352	1.29308
Proteobacteria	Xanthobacteraceae	Anaeromyxobacter	0.484276	0.709916	0.532101	0.747205	-3.65747	-4.11856	-3.36458	1.24136	5.25253	0.188835	0.411458	0.188835
Proteobacteria	Campylobacteraceae	Ancylobacter	0.250689	0.486887	0.218007	0.465078	-3.4923	-1.13853	-4.29408	-3.20054	4.84346	-0.549296	0.270833	0.549296
Proteobacteria	Caulobacteraceae	Arcobacter	0.500832	0.734179	0.534433	0.748979	-4.0284	-3.98071	-4.08535	0.226435	4.6875	0.0422865	0.484375	0.0422865
Proteobacteria	Rhodospirillaceae	Asticcacaulis	0.196422	0.47234	0.19527	0.463548	-1.51672	-3.19553	1.4245	3.72277	5.66971	0.58369	0.246753	0.58369
Firmicutes	Bacillaceae	Azospirillum	0.77718	0.920178	0.418219	0.720418	4.89222	4.32222	5.14155	0.62735	1.78185	0.212352	0.372396	0.212352
Proteobacteria	Bdellovibrionaceae	Bacillus	0.36746	0.690215	0.364201	0.683902	3.65553	4.81563	3.27796	-1.50956	3.61353	-0.385622	0.358442	0.385622
Proteobacteria	Bradyrhizobiaceae	Bdellovibrio	0.583077	0.813941	0.590592	0.821727	0.957337	0.0408616	2.50917	1.49915	6.26564	0.202648	0.392208	0.202648
Proteobacteria	Bradyrhizobiaceae	Bosea	0.0399029	0.240729	0.0685002	0.274692	7.26074	7.62033	6.84843	-1.10813	1.29002	-0.864026	0.184896	0.864026
Proteobacteria	Caulobacteraceae	Bradyrhizobium	0.454453	0.696033	0.48165	0.712537	-3.9234	-3.41086	-4.19907	-1.05457	5.36729	-0.16186	0.40625	0.16186
Proteobacteria	Burkholderiaceae	Brevundimonas	0.0425376	0.254745	0.0923701	0.3423	7.71094	8.65356	6.75341	-2.57778	3.13589	-0.806005	0.208334	0.806005
Proteobacteria	Rhodocyclaceae	Burkholderia	0.00796569	0.104658	0.000889735	0.0186157	2.99492	-3.77703	3.77638	7.45688	3.78306	1.77687	0.00782143	1.77687
Proteobacteria	Francisellaceae	C39	0.728242	0.890804	0.779833	0.915269	0.736868	0.154789	1.66762	0.316878	6.36356	0.0566916	0.46875	0.0566916
Bacteroidetes	[Amoebophilaceae]	Caedibacter	0.762073	0.90774	0.653359	0.834445	-3.22136	-3.6603	-3.01056	0.31091	9.31283	0.0327481	0.46875	0.0327481
Chlamydiae	Parachlamydiaceae	Candidatus Amoebophilus	0.56053	0.773709	0.5956	0.788532	-3.92293	-4.02461	-3.82354	0.492985	4.49541	0.122966	0.438961	0.122966
Bacteroidetes	Flavobacteriaceae	Candidatus Protochlamydia	0.531386	0.761796	0.578479	0.779176	-3.73809	-4.14587	-3.52864	0.458693	4.09086	0.0948096	0.449351	0.0948096
Proteobacteria	Caulobacteraceae	Capnocytophaga	0.492238	0.725618	0.562639	0.760871	-4.05714	-4.13365	-3.9994	0.00399471	4.53897	0.00102661	0.5	0.00102661
Proteobacteria	Alteromonadaceae	Caulobacter	0.007329	0.101612	0.00592845	0.070281	9.85473	11.3871	9.53612	-1.77833	1.24465	-1.33159	0.0703134	1.33159
Bacteroidetes	[Weeksellaceae]	Cellvibrio	0.00171762	0.0654304	0.0003996	0.0125112	11.3552	8.9818	11.7075	2.92174	1.65249	1.79054	0.000182733	1.79054
Proteobacteria	Comamonadaceae	Chryseobacterium	0.347282	0.621269	0.408382	0.663711	-2.72713	0.808763	-3.58488	-2.84854	6.70422	-0.393197	0.369792	0.393197
Actinobacteria	Corynebacteriaceae	Comamonas	0.109009	0.376499	0.0710227	0.293941	2.9906	5.89072	2.07975	-4.20097	7.57438	-0.65012	0.2	0.65012
Proteobacteria	Crenotrichaceae	Corynebacterium	0.340965	0.627885	0.366424	0.657898	-1.29475	1.09423	-2.95775	-3.32975	6.63203	-0.445831	0.322917	0.445831
Actinobacteria	Microbacteriaceae	Crenothrix	0.52348	0.746688	0.557614	0.756246	-3.6527	-3.93411	-3.38567	0.738407	4.10898	0.158404	0.4375	0.158404
Proteobacteria	Oxalobacteraceae	Cryocola	0.563683	0.774802	0.611256	0.792778	-3.85984	-4.04067	-3.74901	0.484315	4.58287	0.0836771	0.453125	0.0836771
Proteobacteria	Comamonadaceae	Cupriavidus	0.416004	0.672515	0.484011	0.698549	-4.06584	-3.41113	-4.51445	-1.27696	5.65199	-0.20083	0.387013	0.20083
Bacteroidetes	Cytophagaceae	Curvibacter	0.00205152	0.0690887	0.000536963	0.0139969	5.81395	7.68716	-0.980907	-8.22107	5.42224	-1.35189	0.0052217	1.35189
Proteobacteria	Rhodocyclaceae	Cytophaga	0.814001	0.93316	0.860917	0.949158	4.34964	4.35659	4.34964	-0.290069	7.78484	-0.0307436	0.476563	0.0307436
Proteobacteria	Hyphomicrobiaceae	Dechloromonas	0.0415553	0.250441	0.0344406	0.214541	3.23285	1.7525	5.10339	4.04459	5.16625	0.874887	0.158855	0.874887
Proteobacteria	Xanthomonadaceae	Devosia	0.00584069	0.0949325	0.000895979	0.0192347	10.1484	11.4924	9.2816	-2.34574	1.55913	-1.40962	0.0156294	1.40962
Bacteroidetes	Cytophagaceae	Dokdonella	0.365791	0.628085	0.416532	0.663288	-3.2751	-4.09263	-2.50757	2.12601	5.55637	0.359835	0.34375	0.359835
Proteobacteria	Moraxellaceae	Emticicia	0.708193	0.896635	0.676129	0.874281	5.91262	6.21023	5.79983	-0.364073	3.40247	-0.0960535	0.418182	0.0960535
Proteobacteria	Enterobacteriaceae	Enhydrobacter	0.579457	0.793879	0.563435	0.780579	-3.80633	-3.27641	-4.01316	-0.881466	5.22798	-0.158418	0.446753	0.158418
Proteobacteria	Enterobacteriaceae	Enterobacter	0.436791	0.684861	0.476961	0.70325	-4.04049	-3.35999	-4.42012	-1.4631	4.62876	-0.268709	0.380208	0.268709
Armatimonadetes	[Fimbriimonadaceae]	Erwinia	0.713591	0.889042	0.817813	0.931517	1.36878	2.6706	1.15487	-0.590124	7.71943	-0.0688523	0.455729	0.0688523
Firmicutes	[Tissierellaceae]	Fimbriimonas	0.499848	0.74941	0.547955	0.759198	-3.74446	-3.90417	-3.67455	0.661863	5.2174	0.112107	0.4375	0.112107
Bacteroidetes	Flavobacteriaceae	Finegoldia	0.543831	0.777384	0.593742	0.801231	-3.72	-3.43794	-4.01809	-0.400551	5.18357	-0.0742868	0.455729	0.0742868
Bacteroidetes	Cytophagaceae	Flavobacterium	0.0910528	0.362073	0.123058	0.394705	8.60983	9.20736	7.96402	-1.38832	2.10867	-0.65994	0.25	0.65994
Bacteroidetes	Cryomorphaceae	Flectobacillus	0.408289	0.712277	0.265113	0.594103	4.72003	3.74344	5.67824	1.67778	4.49912	0.328218	0.299479	0.328218
Fusobacteria	Fusobacteriaceae	Fluviicola	0.218262	0.550258	0.274113	0.610019	6.61489	3.71133	6.92601	3.46743	7.31495	0.475265	0.293507	0.475265
Planctomycetes	Gemmataceae	Fusobacterium	0.421098	0.664421	0.458446	0.684925	-3.90982	-3.20356	-4.28451	-1.30462	4.74832	-0.262762	0.394805	0.262762
Gemmatimonadetes	Gemmatimonadaceae	Gemmata	0.614556	0.825623	0.533488	0.779063	1.02879	0.371356	1.55076	1.52582	6.12438	0.240363	0.377604	0.240363
Acidobacteria	Holophagaceae	Gemmatimonas	0.29051	0.60638	0.25035	0.570128	2.66327	0.85227	3.48869	2.8124	6.58035	0.375869	0.299479	0.375869
Actinobacteria	Gordoniaceae	Geothrix	0.508627	0.753432	0.553013	0.775631	-3.923	-3.93317	-3.92295	0.374401	5.0001	0.0637126	0.467532	0.0637126
Firmicutes	Carnobacteriaceae	Gordonia	0.562758	0.813732	0.450924	0.751572	5.23143	3.49421	6.00529	1.27632	7.87705	0.151254	0.358442	0.151254
Proteobacteria	Pasteurellaceae	Granulicatella	0.499006	0.726572	0.541683	0.748836	-4.09112	-3.68511	-4.33957	-1.10827	4.88984	-0.213698	0.405195	0.213698
Proteobacteria	Halomonadaceae	Haemophilus	0.403587	0.668384	0.478821	0.706904	-3.72253	-2.63221	-4.10437	-1.71421	6.31642	-0.256001	0.364583	0.256001
Proteobacteria	Comamonadaceae	Halomonas	0.55826	0.777167	0.581739	0.790917	-3.85778	-3.20762	-4.16349	-1.01512	4.94124	-0.177315	0.423377	0.177315
Proteobacteria	Rhodocyclaceae	Hydrogenophaga	0.00784839	0.104082	0.0422952	0.23175	8.01454	8.67416	5.95294	-2.84827	1.99266	-1.09689	0.166667	1.09689
Proteobacteria	Hyphomicrobiaceae	Hydrogenophilus	0.528923	0.760384	0.548054	0.77378	-3.90147	-4.17993	-3.78999	0.359998	4.27627	0.0767543	0.46875	0.0767543
Proteobacteria	Rhodospirillaceae	Hyphomicrobium	0.712833	0.892752	0.894431	0.960402	4.25051	4.09652	4.33101	0.140615	5.64549	0.0236516	0.475325	0.0236516
Proteobacteria	Oxalobacteraceae	Inquilinus	0.543318	0.761076	0.57375	0.777555	-3.7889	-3.91121	-3.73965	0.407916	4.53892	0.0694448	0.464935	0.0694448
Proteobacteria	Rhizobiaceae	Janthinobacterium	0.344844	0.673194	0.781865	0.920044	10.3626	9.99531	10.6127	-1.4227	4.33641	-0.326282	0.442708	0.326282
Actinobacteria	Micrococcaceae	Kaistia	0.336607	0.638344	0.322968	0.618292	1.00036	-1.96945	1.893	2.62337	6.16507	0.411349	0.337662	0.411349
Firmicutes	Lactobacillaceae	Kocuria	0.473827	0.709108	0.528737	0.737099	-4.05832	-3.60616	-4.40419	-1.21307	5.72759	-0.178226	0.402597	0.178226
Bacteroidetes	Cytophagaceae	Lactobacillus	0.555362	0.769806	0.539056	0.754864	-4.03053	-3.75867	-4.14917	-0.627206	5.67589	-0.0979721	0.441558	0.0979721
Proteobacteria	Legionellaceae	Leadbetterella	0.219532	0.467154	0.21681	0.451961	-2.65385	-3.94233	-1.12889	2.98177	4.63376	0.563138	0.273438	0.563138
Proteobacteria	Comamonadaceae	Legionella	0.548744	0.768179	0.557343	0.76249	-3.82785	-3.79594	-3.84377	-0.0745709	4.79415	-0.012053	0.494792	0.012053
Proteobacteria	Xanthomonadaceae	Limnohabitans	0.0144188	0.14015	0.032786	0.200278	10.2864	10.917	9.75352	-1.52828	1.56919	-0.965978	0.145834	0.965978
Verrucomicrobia	Verrucomicrobiaceae	Luteibacter	0.0565229	0.257642	0.0234297	0.162263	0.697674	3.34605	-2.71539	-5.55059	5.76658	-0.902028	0.122078	0.902028
Firmicutes	Planococcaceae	Luteolibacter	0.486382	0.712636	0.545356	0.749281	-2.7059	-2.20595	-3.06094	-1.66236	5.34641	-0.266181	0.376623	0.266181
Proteobacteria	Phyllobacteriaceae	Lysinibacillus	0.482586	0.715652	0.490911	0.722349	-4.14846	-3.63198	-4.46496	-0.652754	5.51352	-0.129771	0.436364	0.129771
Proteobacteria	Comamonadaceae	Mesorhizobium	0.0197074	0.168029	0.0267795	0.187344	10.9866	12.4544	10.5549	-1.9069	1.80239	-1.03517	0.14026	1.03517
Proteobacteria	Methylobacteriaceae	Methylibium	0.119226	0.415665	0.0768107	0.311192	6.51372	4.68262	7.07181	2.06716	4.09522	0.500859	0.200521	0.500859
Proteobacteria	Piscirickettsiaceae	Methylobacterium	0.704132	0.876339	0.68491	0.855525	-2.72308	-2.06685	-3.1273	-0.386919	7.96374	-0.0522652	0.473958	0.0522652
Proteobacteria	Methylophilaceae	Methylophaga	0.573114	0.792013	0.583618	0.795692	-3.91386	-3.87367	-3.95999	0.17739	4.90041	0.029267	0.484375	0.029267
Proteobacteria	Rhodocyclaceae	Methylotenera	0.343986	0.610643	0.445779	0.659999	-3.96517	-2.99365	-4.3755	-2.15556	6.54543	-0.307429	0.363636	0.307429
Actinobacteria	Geodermatophilaceae	Methyloversatilis	0.125082	0.407418	0.0642202	0.274009	4.28875	-1.94085	5.90736	4.05261	7.48199	0.659306	0.182292	0.659306
Actinobacteria	Mycobacteriaceae	Modestobacter	0.515831	0.760376	0.552975	0.763551	-3.92378	-3.91065	-3.92768	0.343441	5.10441	0.0583258	0.472727	0.0583258
Proteobacteria	Caulobacteraceae	Mycobacterium	0.697786	0.865738	0.71951	0.87865	-2.49954	-2.35764	-2.59379	-0.503599	7.43269	-0.0615858	0.466146	0.0615858
Proteobacteria	Sinobacteraceae	Mycoplana	0.306976	0.636222	0.491966	0.769895	9.37477	9.03208	9.48531	0.442509	1.75377	0.254672	0.384416	0.254672
Nitrospirae	Nitrospiraceae	Nevskia	0.191437	0.519491	0.165229	0.459777	6.379	3.90789	6.5852	2.44762	4.05907	0.457767	0.273438	0.457767
Proteobacteria	Sphingomonadaceae	Nitrospira	0.127398	0.333357	0.128094	0.332859	-2.31481	-4.13476	-0.550398	3.81898	4.70916	0.725682	0.2	0.725682
Verrucomicrobia	Opitutaceae	Novosphingobium	0.700246	0.888313	0.828973	0.937369	4.87669	4.1287	5.29569	0.318766	3.73095	0.0635834	0.455729	0.0635834
Firmicutes	Paenibacillaceae	Opitutus	0.167723	0.47383	0.107124	0.369105	3.17024	0.449576	3.93148	3.79207	5.10027	0.611882	0.244792	0.611882
Proteobacteria	Rhodobacteraceae	Paenibacillus	0.17424	0.418198	0.138505	0.381289	-2.49805	0.19574	-4.04669	-3.67949	5.17245	-0.652302	0.226563	0.652302
Proteobacteria	Hyphomicrobiaceae	Paracoccus	0.512661	0.746883	0.537086	0.759227	-3.57329	-3.27134	-3.82223	-0.835132	5.23333	-0.140808	0.441558	0.140808
Bacteroidetes	Sphingobacteriaceae	Parvibaculum	0.608002	0.819198	0.698931	0.86687	-1.61865	-1.96989	-1.43056	0.190153	4.59357	0.0405535	0.480519	0.0405535
Proteobacteria	Hyphomicrobiaceae	Pedobacter	0.168256	0.421521	0.177576	0.420812	-2.85352	1.00395	-3.84218	-4.40662	6.39576	-0.631781	0.25	0.631781
Verrucomicrobia	[Pedosphaeraceae]	Pedomicrobium	0.314603	0.595734	0.2921	0.567207	-1.57888	-3.30827	0.44013	2.68763	5.19301	0.427588	0.309091	0.427588
Proteobacteria	Moraxellaceae	Pedosphaera	0.30676	0.581425	0.459587	0.698552	-3.45154	-4.05777	-3.0417	1.68559	6.59962	0.188094	0.385417	0.188094
Proteobacteria	Rhodospirillaceae	Perlucidibaca	0.832213	0.941858	0.523761	0.80072	6.10955	5.0199	6.76873	1.14418	3.53037	0.216257	0.382813	0.216257
Proteobacteria	Caulobacteraceae	Phaeospirillum	0.525296	0.7568	0.624563	0.809152	-3.15317	-3.04386	-3.23712	-0.326263	4.86476	-0.0723303	0.460938	0.0723303
Cyanobacteria	Phormidiaceae	Phenylobacterium	0.838879	0.943923	0.780793	0.919043	7.25063	6.91358	7.37611	0.208008	1.21603	0.173198	0.453125	0.173198
Actinobacteria	Intrasporangiaceae	Phormidium	0.125285	0.376576	0.254583	0.506141	-2.87286	-3.89932	-1.43788	4.90424	7.14762	0.634936	0.286458	0.634936
Proteobacteria	Phyllobacteriaceae	Phycicoccus	0.4783	0.723053	0.534384	0.754976	-3.85384	-4.01533	-3.70524	0.701619	4.8937	0.135381	0.427083	0.135381
Planctomycetes	Pirellulaceae	Phyllobacterium	0.22634	0.488725	0.214292	0.475053	-2.78115	0.538497	-3.63281	-3.58373	5.66381	-0.556107	0.252604	0.556107
Planctomycetes	Planctomycetaceae	Pirellula	0.587561	0.8105	0.639347	0.838637	-3.15805	-3.10349	-3.18791	0.128515	5.2384	0.0255825	0.493506	0.0255825
Proteobacteria	Comamonadaceae	Planctomyces	0.602401	0.828398	0.550425	0.800582	2.45153	1.98038	2.67868	1.21155	8.11381	0.181997	0.380208	0.181997
Proteobacteria	Oxalobacteraceae	Polaromonas	0.119615	0.362968	0.151605	0.404513	-1.63462	2.22253	-3.10837	-4.76947	6.67678	-0.71976	0.241559	0.71976
Bacteroidetes	Cytophagaceae	Polynucleobacter	0.0100451	0.116552	0.0178415	0.144112	5.05019	6.09601	4.52694	-1.80586	1.67294	-1.10941	0.104167	1.10941
Bacteroidetes	[Paraprevotellaceae]	Pontibacter	0.471255	0.7112	0.515911	0.734598	-4.02931	-4.15964	-3.84961	0.315072	4.34591	0.0638325	0.47013	0.0638325
Proteobacteria	Rhodocyclaceae	Propionivibrio	0.43181	0.678731	0.480785	0.708649	-3.68819	-4.13346	-3.18236	1.4854	4.96122	0.268997	0.395833	0.268997
Verrucomicrobia	Verrucomicrobiaceae	Prosthecobacter	0.0310542	0.211296	0.00718344	0.0850765	5.06315	1.96002	5.71844	4.07111	3.85377	1.01489	0.0781258	1.01489
Cyanobacteria	Pseudanabaenaceae	Pseudanabaena	0.317404	0.574197	0.383982	0.625212	-3.22024	-3.97394	-2.40701	2.39938	5.94232	0.364197	0.327273	0.364197
Proteobacteria	Pseudomonadaceae	Pseudomonas	0.918129	0.968629	0.836376	0.939328	13.7843	13.4077	14.3261	0.233667	2.60175	0.0692506	0.475325	0.0692506
Actinobacteria	Pseudonocardiaceae	Pseudonocardia	0.525668	0.759879	0.567731	0.77455	-3.92397	-3.96552	-3.90775	-0.100958	4.5638	-0.0216501	0.488312	0.0216501
Proteobacteria	Xanthomonadaceae	Pseudoxanthomonas	0.00317505	0.0814775	0.00679945	0.0807325	6.34936	7.40234	5.62761	-1.91995	1.62293	-1.17297	0.0753255	1.17297
Proteobacteria	[Chromatiaceae]	Rheinheimera	0.0655809	0.313776	0.0965004	0.346307	12.0303	12.9064	11.6806	-1.49304	2.27265	-0.650188	0.231169	0.650188
Proteobacteria	Rhodobacteraceae	Rhodobacter	0.847446	0.946007	0.848562	0.942573	8.16493	7.99757	8.19043	0.21563	2.23679	0.0941714	0.464935	0.0941714
Actinobacteria	Nocardiaceae	Rhodococcus	0.509533	0.751675	0.519649	0.745236	-3.97548	-4.01427	-3.93929	-0.0848565	5.30979	-0.0202632	0.485714	0.0202632
Proteobacteria	Comamonadaceae	Rhodoferax	0.115977	0.403815	0.174732	0.46857	8.14721	8.64607	7.51166	-1.06662	1.68836	-0.558552	0.27013	0.558552
Proteobacteria	Hyphomicrobiaceae	Rhodoplanes	0.701381	0.879599	0.771869	0.906793	-0.701126	1.49536	-1.00705	-0.205541	7.07639	-0.0312258	0.479167	0.0312258
Proteobacteria	Rickettsiaceae	Rickettsia	0.327872	0.610552	0.31648	0.593911	-1.82409	1.80405	-2.69108	-2.62627	6.24867	-0.375291	0.325521	0.375291
Proteobacteria	Acetobacteraceae	Roseococcus	0.750725	0.90681	0.835928	0.937356	0.388188	0.296838	0.51808	0.280731	6.16375	0.0454499	0.477922	0.0454499
Actinobacteria	Micrococcaceae	Rothia	0.629158	0.831922	0.649199	0.835305	-3.61202	-3.49694	-3.69433	-0.220823	6.79092	-0.0255721	0.489583	0.0255721
Proteobacteria	Comamonadaceae	Rubrivivax	0.124024	0.421591	0.0801948	0.316845	6.33335	4.45139	6.74796	2.14051	2.99503	0.568284	0.213542	0.568284
Firmicutes	Ruminococcaceae	Ruminococcus	0.484232	0.715042	0.502065	0.72626	-4.05729	-3.4289	-4.34975	-0.640273	4.50241	-0.125631	0.419271	0.125631
Bacteroidetes	Cytophagaceae	Runella	0.578878	0.82694	0.610855	0.847136	3.43426	3.14337	4.75426	1.49993	5.07629	0.196745	0.388021	0.196745
Actinobacteria	Microbacteriaceae	Salinibacterium	0.202713	0.515759	0.0433067	0.229255	3.87721	2.49338	4.40384	2.01779	4.7006	0.522987	0.163637	0.522987
Firmicutes	Staphylococcaceae	Salinicoccus	0.487047	0.71903	0.49678	0.723016	-4.06822	-3.645	-4.3023	-0.970564	4.55172	-0.198282	0.401042	0.198282
Bacteroidetes	[Amoebophilaceae]	SC3-56	0.482249	0.71024	0.50947	0.71714	-3.48191	-3.91489	-3.09231	1.42544	4.79081	0.245934	0.382813	0.245934
Bacteroidetes	Chitinophagaceae	Sediminibacterium	0.0847462	0.353502	0.0156406	0.141209	7.45575	5.35896	8.11542	3.01028	3.20967	0.751823	0.125	0.751823
SAR406	A714017	SGSH944	0.549706	0.767311	0.578439	0.78451	-4.07253	-4.14875	-3.97776	0.1951	4.65895	0.0397598	0.480519	0.0397598
Proteobacteria	Shewanellaceae	Shewanella	0.303531	0.55167	0.320578	0.563607	-3.60191	-1.9828	-4.32669	-2.67733	5.00836	-0.467142	0.299479	0.467142
Proteobacteria	Sphingomonadaceae	Sphingobium	0.077241	0.340107	0.0429446	0.23518	4.29707	2.48809	5.89563	3.21779	4.21665	0.643007	0.184896	0.643007
Proteobacteria	Sphingomonadaceae	Sphingomonas	0.446456	0.742117	0.537289	0.788422	6.81789	6.62363	7.05168	0.256502	1.16372	0.219228	0.401042	0.219228
Proteobacteria	Sphingomonadaceae	Sphingopyxis	0.778155	0.917522	0.786551	0.915877	0.814529	1.04053	0.732871	-0.80844	9.67117	-0.112425	0.473958	0.112425
Spirochaetes	Spirochaetaceae	Spirochaeta	0.517664	0.742617	0.529225	0.738947	-3.97287	-4.32085	-3.78367	0.851266	4.50214	0.153233	0.432292	0.153233
Firmicutes	Staphylococcaceae	Staphylococcus	0.532443	0.7866	0.610898	0.847301	2.73213	3.71574	2.54184	-1.2211	6.95719	-0.146452	0.408854	0.146452
Proteobacteria	Xanthomonadaceae	Stenotrophomonas	0.280266	0.59664	0.289382	0.609893	1.72789	3.62448	1.27243	-3.83672	7.01424	-0.475761	0.309896	0.475761
Proteobacteria	Sinobacteraceae	Steroidobacter	0.627876	0.831462	0.598634	0.803696	-2.37295	-3.12212	-1.72038	0.931729	5.35774	0.158633	0.445313	0.158633
Firmicutes	Streptococcaceae	Streptococcus	0.628368	0.83686	0.595865	0.815802	-0.54862	-2.31992	0.0977155	1.78813	6.05904	0.222016	0.423377	0.222016
Actinobacteria	Streptomycetaceae	Streptomyces	0.551223	0.770161	0.586938	0.785132	-4.0851	-4.13421	-4.06531	0.0281308	4.81937	0.00843408	0.497396	0.00843408
Proteobacteria	Rhodocyclaceae	Sulfuritalea	0.554347	0.775313	0.603205	0.799513	-3.79072	-3.91005	-3.65891	0.352471	4.47674	0.0792887	0.464935	0.0792887
Actinobacteria	Intrasporangiaceae	Terracoccus	0.531026	0.760375	0.569377	0.775574	-4.00126	-4.04117	-3.9895	0.278219	5.03708	0.0470588	0.47013	0.0470588
Proteobacteria	Rhodocyclaceae	Thauera	0.543676	0.775836	0.625339	0.812089	-4.15401	-4.31145	-4.00679	0.624691	5.22164	0.116344	0.4375	0.116344
Proteobacteria	Xanthomonadaceae	Thermomonas	0.566377	0.791464	0.607035	0.810762	-2.85757	-3.30066	-2.52549	1.08352	5.80936	0.150522	0.419271	0.150522
Actinobacteria	Tsukamurellaceae	Tsukamurella	0.409674	0.654269	0.439963	0.665131	-3.87949	-3.17076	-4.32338	-1.27303	4.71227	-0.260144	0.374026	0.260144
Firmicutes	Veillonellaceae	Veillonella	0.538257	0.757755	0.591321	0.788305	-4.04678	-4.1374	-4.00087	0.147287	4.54981	0.0272517	0.485714	0.0272517
Proteobacteria	Xanthobacteraceae	Xanthobacter	0.000655396	0.0356427	0.000580669	0.0148722	-0.121628	3.1206	-3.09118	-6.10931	3.52154	-1.62352	0.00520814	1.62352
Proteobacteria	Rhodocyclaceae	Zoogloea	0.00744011	0.103176	0.0003996	0.0125112	6.46994	-2.33394	7.72155	9.81669	5.32971	1.65769	0.000182733	1.65769

## Sheet: t2_vs_t7
Phylum	Family	Genus	we.ep	we.eBH	wi.ep	wi.eBH	rab.all	rab.win.2	rab.win.7	diff.btw	diff.win	effect	overlap	absolute_effect
Proteobacteria	Alcaligenaceae	Achromobacter	0.259807	0.409777	0.318165	0.459875	-3.05574	-2.0136	-4.24586	-2.43128	5.83295	-0.38733	0.332468	0.38733
Proteobacteria	Comamonadaceae	Acidovorax	0.0331555	0.124653	0.0071772	0.0389902	6.38845	7.22239	1.20188	-7.08331	5.83558	-1.08734	0.0805203	1.08734
Proteobacteria	Moraxellaceae	Acinetobacter	0.0224559	0.0983099	0.0557255	0.156416	5.15545	7.83708	4.15326	-3.62047	4.55727	-0.922618	0.202598	0.922618
Actinobacteria	Actinomycetaceae	Actinomyces	0.213479	0.339216	0.231181	0.345897	-3.73932	-2.54462	-5.07346	-2.73157	4.68893	-0.526273	0.276042	0.526273
Firmicutes	Aerococcaceae	Aerococcus	0.307606	0.457695	0.309856	0.448566	-4.07275	-3.36091	-5.1393	-1.81439	4.76523	-0.357145	0.320313	0.357145
Proteobacteria	Rhizobiaceae	Agrobacterium	0.719794	0.826042	0.854592	0.912363	7.02799	7.04626	7.01668	-0.118975	1.53164	-0.0788822	0.472727	0.0788822
Proteobacteria	Myxococcaceae	Anaeromyxobacter	0.613563	0.733131	0.592142	0.708694	-3.745	-3.49005	-4.21886	-0.492238	5.33065	-0.095292	0.444156	0.095292
Proteobacteria	Xanthobacteraceae	Ancylobacter	0.432488	0.576851	0.451932	0.586196	-3.41252	-2.84966	-4.37072	-1.51899	5.26052	-0.251704	0.377604	0.251704
Proteobacteria	Campylobacteraceae	Arcobacter	0.327855	0.45348	0.32817	0.441129	-3.88602	-3.05517	-5.11249	-1.88308	4.19436	-0.38889	0.311688	0.38889
Proteobacteria	Caulobacteraceae	Asticcacaulis	0.0392631	0.106179	0.0164055	0.0636173	-1.54079	-3.00133	2.69045	5.43381	4.27683	1.11137	0.101563	1.11137
Proteobacteria	Rhodospirillaceae	Azospirillum	0.354465	0.540788	0.593658	0.7308	4.88443	4.60273	4.9761	0.384665	1.6463	0.118163	0.38961	0.118163
Firmicutes	Bacillaceae	Bacillus	4.63257e-05	0.00154842	0.000455794	0.0056524	3.60081	5.27445	1.27141	-3.86925	1.75666	-2.12245	0.000182733	2.12245
Proteobacteria	Bdellovibrionaceae	Bdellovibrio	0.00278459	0.0218997	0.00240385	0.0182468	0.974313	-1.97647	3.2804	5.40069	3.6711	1.3	0.0651052	1.3
Proteobacteria	Bradyrhizobiaceae	Bosea	0.0141526	0.0718953	0.0111545	0.0512869	7.25118	7.54746	6.29201	-1.45272	1.18661	-1.13316	0.0935072	1.13316
Proteobacteria	Bradyrhizobiaceae	Bradyrhizobium	0.252857	0.397775	0.304964	0.43544	-3.871	-3.11129	-5.03625	-2.23821	5.19994	-0.401792	0.291667	0.401792
Proteobacteria	Caulobacteraceae	Brevundimonas	0.0369579	0.133226	0.0471716	0.139651	7.7076	8.45683	6.45189	-2.37461	2.80553	-0.830727	0.179221	0.830727
Proteobacteria	Burkholderiaceae	Burkholderia	0.742291	0.837259	0.389329	0.564949	2.98506	3.64285	2.76241	-0.856992	6.80807	-0.144143	0.327273	0.144143
Proteobacteria	Rhodocyclaceae	C39	0.607283	0.724936	0.532489	0.674275	0.788513	-0.987399	1.88447	1.07016	6.40468	0.15464	0.397403	0.15464
Proteobacteria	Francisellaceae	Caedibacter	0.191779	0.351285	0.376681	0.525469	-3.15967	-3.61281	2.40933	6.57655	8.45077	0.592063	0.335938	0.592063
Bacteroidetes	[Amoebophilaceae]	Candidatus Amoebophilus	0.536975	0.666908	0.572737	0.691113	-3.83818	-3.60236	-4.34654	-0.287793	4.52164	-0.0641066	0.464935	0.0641066
Chlamydiae	Parachlamydiaceae	Candidatus Protochlamydia	0.500257	0.632243	0.55147	0.671113	-3.84817	-3.62464	-4.20138	-0.543258	4.54299	-0.106963	0.449351	0.106963
Bacteroidetes	Flavobacteriaceae	Capnocytophaga	0.349393	0.474581	0.330416	0.443273	-3.89981	-2.87981	-4.93566	-1.98084	4.19803	-0.370664	0.338542	0.370664
Proteobacteria	Caulobacteraceae	Caulobacter	0.447126	0.617222	0.617253	0.745198	9.84442	9.82651	9.85916	0.368856	1.85686	0.19688	0.4	0.19688
Proteobacteria	Alteromonadaceae	Cellvibrio	0.330727	0.521189	0.298885	0.484857	11.3438	11.1656	11.7119	1.34374	3.02308	0.401637	0.319481	0.401637
Bacteroidetes	[Weeksellaceae]	Chryseobacterium	0.168751	0.312597	0.168347	0.298699	-2.54677	-0.542555	-4.26745	-3.8681	6.20495	-0.633883	0.236979	0.633883
Proteobacteria	Comamonadaceae	Comamonas	0.126853	0.279431	0.0586226	0.158017	2.98997	5.81749	0.582157	-4.32108	7.30254	-0.635577	0.200521	0.635577
Actinobacteria	Corynebacteriaceae	Corynebacterium	0.0606553	0.165798	0.0672203	0.165952	-1.22738	1.16366	-4.15813	-5.462	5.88245	-0.892741	0.174026	0.892741
Proteobacteria	Crenotrichaceae	Crenothrix	0.479765	0.620825	0.502616	0.633124	-3.70379	-3.30096	-4.1645	-0.969756	4.32956	-0.185572	0.405195	0.185572
Actinobacteria	Microbacteriaceae	Cryocola	0.525782	0.659383	0.56525	0.689312	-3.992	-3.70945	-4.3965	-0.751838	4.92248	-0.122779	0.451948	0.122779
Proteobacteria	Oxalobacteraceae	Cupriavidus	0.278049	0.415381	0.304853	0.433274	-3.80007	-3.05	-4.90152	-1.96544	4.81698	-0.327038	0.324675	0.327038
Proteobacteria	Comamonadaceae	Curvibacter	0.0832399	0.223349	0.44616	0.625072	5.82659	-0.876179	6.05854	6.10808	7.55695	0.560127	0.369792	0.560127
Bacteroidetes	Cytophagaceae	Cytophaga	0.0256057	0.105944	0.0750437	0.191686	4.3316	-1.04824	5.18944	6.13922	5.50964	0.848094	0.210938	0.848094
Proteobacteria	Rhodocyclaceae	Dechloromonas	0.0863396	0.221945	0.0256993	0.0933558	3.1844	5.10639	1.80867	-3.92716	5.3778	-0.710802	0.151042	0.710802
Proteobacteria	Hyphomicrobiaceae	Devosia	0.942488	0.965089	0.593388	0.735247	10.1573	10.1963	9.85963	-0.597035	2.4195	-0.211094	0.398438	0.211094
Proteobacteria	Xanthomonadaceae	Dokdonella	0.64962	0.761376	0.697521	0.793157	-3.18375	-3.05477	-3.47314	-0.106969	5.98342	-0.0171737	0.485714	0.0171737
Bacteroidetes	Cytophagaceae	Emticicia	0.0150686	0.078213	0.0140328	0.0613446	5.89384	4.67962	6.74557	2.11158	2.61729	0.846024	0.11198	0.846024
Proteobacteria	Moraxellaceae	Enhydrobacter	0.247107	0.376301	0.292429	0.410463	-3.78113	-2.71084	-4.91524	-2.59396	4.69868	-0.477045	0.294271	0.477045
Proteobacteria	Enterobacteriaceae	Enterobacter	0.349556	0.476593	0.350311	0.473908	-3.96997	-3.21911	-4.89385	-1.75414	4.52255	-0.385613	0.320313	0.385613
Proteobacteria	Enterobacteriaceae	Erwinia	0.0326754	0.110814	0.0188187	0.0706624	1.38298	3.66227	-3.66045	-6.19394	5.69553	-1.04842	0.11198	1.04842
Armatimonadetes	[Fimbriimonadaceae]	Fimbriimonas	0.614779	0.734683	0.599243	0.714538	-3.8889	-3.55685	-4.47431	-0.531808	5.31091	-0.0950341	0.463542	0.0950341
Firmicutes	[Tissierellaceae]	Finegoldia	0.445832	0.58504	0.477963	0.611441	-3.78811	-3.19497	-4.46941	-1.50797	4.54466	-0.307004	0.366234	0.307004
Bacteroidetes	Flavobacteriaceae	Flavobacterium	0.44714	0.616963	0.491627	0.657149	8.58009	7.9715	8.84875	0.885093	2.1242	0.324392	0.384416	0.324392
Bacteroidetes	Cytophagaceae	Flectobacillus	0.0347631	0.127414	0.0353959	0.114021	4.66826	3.78361	6.71551	3.043	3.80348	0.665322	0.166234	0.665322
Bacteroidetes	Cryomorphaceae	Fluviicola	0.000627155	0.0075733	0.0003996	0.00525407	6.62987	3.55734	10.0371	6.76475	3.00338	2.32583	0.000182733	2.32583
Fusobacteria	Fusobacteriaceae	Fusobacterium	0.280206	0.417677	0.313819	0.44312	-4.01213	-3.12826	-5.13089	-2.00938	4.59266	-0.432126	0.28052	0.432126
Planctomycetes	Gemmataceae	Gemmata	0.00059025	0.00750776	0.000639985	0.00698627	0.956452	-2.41468	3.65987	6.19298	3.4154	1.6017	0.00782143	1.6017
Gemmatimonadetes	Gemmatimonadaceae	Gemmatimonas	0.125522	0.256377	0.0228646	0.0858335	2.6163	1.72138	5.31493	3.40504	5.47895	0.734567	0.148052	0.734567
Acidobacteria	Holophagaceae	Geothrix	0.282053	0.417105	0.310399	0.434097	-3.90956	-3.09563	-5.10888	-2.20935	4.63843	-0.395728	0.296875	0.395728
Actinobacteria	Gordoniaceae	Gordonia	0.192357	0.362368	0.0671266	0.175418	5.17953	6.49084	1.91144	-3.8062	7.64223	-0.5049	0.192709	0.5049
Firmicutes	Carnobacteriaceae	Granulicatella	0.330091	0.471714	0.327721	0.465937	-3.91932	-3.10952	-4.95122	-1.87332	4.36432	-0.373183	0.3125	0.373183
Proteobacteria	Pasteurellaceae	Haemophilus	0.108007	0.230104	0.159456	0.282829	-3.68856	-2.27979	-5.43669	-3.89098	5.77697	-0.60773	0.223959	0.60773
Proteobacteria	Halomonadaceae	Halomonas	0.241565	0.37214	0.239546	0.360893	-3.71029	-2.62442	-4.98488	-2.56965	4.50937	-0.502089	0.260417	0.502089
Proteobacteria	Comamonadaceae	Hydrogenophaga	0.643314	0.770683	0.422752	0.604762	7.9996	7.12297	8.90919	0.787668	3.98225	0.236434	0.376623	0.236434
Proteobacteria	Rhodocyclaceae	Hydrogenophilus	0.484224	0.61789	0.513291	0.640942	-3.82032	-3.48918	-4.24548	-0.757806	4.34575	-0.163279	0.414063	0.163279
Proteobacteria	Hyphomicrobiaceae	Hyphomicrobium	0.00627806	0.0424292	0.00438936	0.0271932	4.22096	3.59459	7.23201	4.2398	4.14001	1.03751	0.0651052	1.03751
Proteobacteria	Rhodospirillaceae	Inquilinus	0.600873	0.720546	0.608715	0.72329	-3.88825	-3.65159	-4.25243	-0.342564	5.00633	-0.0715677	0.46875	0.0715677
Proteobacteria	Oxalobacteraceae	Janthinobacterium	7.08747e-05	0.00197095	0.0003996	0.00525407	10.3426	10.8884	6.34608	-4.56862	1.59715	-2.73867	0.000182733	2.73867
Proteobacteria	Rhizobiaceae	Kaistia	0.000736075	0.00826446	0.000602522	0.0068538	1.09938	-2.58427	4.28146	6.65615	3.52597	1.73762	0.00780112	1.73762
Actinobacteria	Micrococcaceae	Kocuria	0.34867	0.482187	0.355292	0.479342	-3.99246	-3.20191	-4.81751	-1.76281	5.00676	-0.324064	0.328125	0.324064
Firmicutes	Lactobacillaceae	Lactobacillus	0.294701	0.424353	0.294577	0.416547	-3.81345	-2.87164	-4.88545	-2.26907	5.05136	-0.37815	0.3125	0.37815
Bacteroidetes	Cytophagaceae	Leadbetterella	0.189665	0.322607	0.122203	0.24872	-2.70833	-3.6318	-0.271262	3.24093	4.4076	0.665217	0.216146	0.665217
Proteobacteria	Legionellaceae	Legionella	0.525493	0.662289	0.532382	0.664024	-3.90485	-3.67978	-4.16735	-0.159396	4.96029	-0.0271062	0.481771	0.0271062
Proteobacteria	Comamonadaceae	Limnohabitans	0.0741916	0.203365	0.0725462	0.185631	10.261	10.6898	9.3342	-1.3734	1.59748	-0.788492	0.192208	0.788492
Proteobacteria	Xanthomonadaceae	Luteibacter	0.314725	0.488943	0.234	0.403165	0.673921	1.89907	-3.485	-3.97579	6.95947	-0.525932	0.303896	0.525932
Verrucomicrobia	Verrucomicrobiaceae	Luteolibacter	0.229668	0.358531	0.156977	0.289768	-2.72464	-3.59058	-0.303974	3.04493	4.56493	0.544807	0.244156	0.544807
Firmicutes	Planococcaceae	Lysinibacillus	0.302199	0.437463	0.300404	0.431111	-4.06249	-3.14547	-5.27449	-2.02931	5.08977	-0.353404	0.306494	0.353404
Proteobacteria	Phyllobacteriaceae	Mesorhizobium	0.0132191	0.0707179	0.0157155	0.0667907	10.9905	12.089	10.1192	-1.99754	1.72604	-1.11849	0.117188	1.11849
Proteobacteria	Comamonadaceae	Methylibium	0.105828	0.257076	0.0348776	0.113191	6.50495	6.09638	7.46384	1.47067	3.5284	0.49488	0.14323	0.49488
Proteobacteria	Methylobacteriaceae	Methylobacterium	0.309817	0.468646	0.379669	0.526429	-2.73604	-3.20475	1.5098	4.41584	7.79724	0.527379	0.335065	0.527379
Proteobacteria	Piscirickettsiaceae	Methylophaga	0.357063	0.491329	0.364954	0.488341	-3.96441	-3.07519	-4.80918	-1.85652	4.66533	-0.379188	0.307292	0.379188
Proteobacteria	Methylophilaceae	Methylotenera	0.264704	0.396909	0.33132	0.460019	-3.90106	-3.02487	-4.86532	-2.59859	5.77547	-0.42208	0.302083	0.42208
Proteobacteria	Rhodocyclaceae	Methyloversatilis	0.00253101	0.0221607	0.0104614	0.0518395	4.25558	-2.04096	6.03527	7.94543	4.71969	1.36609	0.111689	1.36609
Actinobacteria	Geodermatophilaceae	Modestobacter	0.338461	0.480548	0.366825	0.500883	-4.06728	-3.31644	-4.85907	-1.85532	5.32203	-0.319204	0.32987	0.319204
Actinobacteria	Mycobacteriaceae	Mycobacterium	0.176117	0.320936	0.179277	0.314517	-2.58034	-0.769963	-4.19606	-3.82919	6.31723	-0.58551	0.244156	0.58551
Proteobacteria	Caulobacteraceae	Mycoplana	0.475418	0.63705	0.829346	0.89477	9.38052	9.42509	9.36317	0.0630965	1.52893	0.0331106	0.484375	0.0331106
Proteobacteria	Sinobacteraceae	Nevskia	0.171079	0.342473	0.48942	0.653694	6.37336	6.42279	6.31343	2.08107	3.4738	0.420847	0.371429	0.420847
Nitrospirae	Nitrospiraceae	Nitrospira	0.220074	0.36609	0.198814	0.346917	-2.37658	-3.44441	-0.202622	3.19011	5.60306	0.525329	0.283854	0.525329
Proteobacteria	Sphingomonadaceae	Novosphingobium	0.0141067	0.0686708	0.00116446	0.0108103	4.84406	3.33738	6.20297	2.85326	1.9029	1.3712	0.0260443	1.3712
Verrucomicrobia	Opitutaceae	Opitutus	0.00325685	0.025136	0.00365572	0.02507	3.14122	0.787921	5.94685	4.81082	3.70097	1.26915	0.0651052	1.26915
Firmicutes	Paenibacillaceae	Paenibacillus	0.465648	0.613037	0.470556	0.618354	-2.55283	-2.00117	-3.54952	-1.50263	5.71965	-0.228059	0.385417	0.228059
Proteobacteria	Rhodobacteraceae	Paracoccus	0.510208	0.646574	0.482958	0.618636	-3.59585	-2.9741	-4.41952	-1.28829	5.34661	-0.230299	0.379221	0.230299
Proteobacteria	Hyphomicrobiaceae	Parvibaculum	0.113812	0.226401	0.0766327	0.178788	-1.62623	-3.14259	-0.274341	2.55266	3.46969	0.613563	0.197917	0.613563
Bacteroidetes	Sphingobacteriaceae	Pedobacter	0.495798	0.639897	0.573729	0.697632	-2.74259	-2.99876	-0.585587	1.89203	6.71218	0.239626	0.397403	0.239626
Proteobacteria	Hyphomicrobiaceae	Pedomicrobium	0.0714191	0.150846	0.0223495	0.0770639	-1.50559	-3.31766	1.70124	4.50186	4.29164	0.895046	0.119792	0.895046
Verrucomicrobia	[Pedosphaeraceae]	Pedosphaera	0.375629	0.535238	0.57603	0.699812	-3.42249	-3.51594	-3.26874	1.18525	9.40011	0.172664	0.427083	0.172664
Proteobacteria	Moraxellaceae	Perlucidibaca	0.189568	0.365306	0.120592	0.264	6.1369	7.46947	5.16213	-2.41501	3.52959	-0.479462	0.251948	0.479462
Proteobacteria	Rhodospirillaceae	Phaeospirillum	0.442831	0.577584	0.454739	0.584374	-3.1521	-3.5397	-2.27442	1.33675	4.51283	0.270451	0.382813	0.270451
Proteobacteria	Caulobacteraceae	Phenylobacterium	0.57116	0.708104	0.55748	0.702289	7.25357	7.01247	7.37841	0.371178	1.25645	0.259047	0.411458	0.259047
Cyanobacteria	Phormidiaceae	Phormidium	0.676759	0.787736	0.689798	0.792166	-2.8583	-2.64511	-3.2501	0.36356	8.58757	0.0391087	0.479167	0.0391087
Actinobacteria	Intrasporangiaceae	Phycicoccus	0.58855	0.7121	0.569537	0.696028	-3.84366	-3.67031	-4.20436	-0.449674	5.02682	-0.0863882	0.463542	0.0863882
Proteobacteria	Phyllobacteriaceae	Phyllobacterium	0.704359	0.804761	0.693341	0.796962	-3.08072	-2.71489	-3.77718	-0.544367	6.50388	-0.096558	0.451948	0.096558
Planctomycetes	Pirellulaceae	Pirellula	0.35708	0.497957	0.342414	0.487328	-3.10121	-3.60887	-0.710899	2.63223	5.16739	0.451311	0.289063	0.451311
Planctomycetes	Planctomycetaceae	Planctomyces	0.000544141	0.00677106	0.0003996	0.00525407	2.44777	-1.79706	6.01633	7.73197	3.90741	1.96676	0.000182733	1.96676
Proteobacteria	Comamonadaceae	Polaromonas	0.157848	0.311556	0.140253	0.283148	-1.64647	-2.57489	3.19176	4.59883	7.67698	0.605365	0.257143	0.605365
Proteobacteria	Oxalobacteraceae	Polynucleobacter	0.898211	0.939623	0.80969	0.884852	5.03942	4.91642	5.50204	0.409904	2.318	0.148623	0.447917	0.148623
Bacteroidetes	Cytophagaceae	Pontibacter	0.450197	0.587083	0.460772	0.590312	-3.7768	-3.57639	-4.08901	-0.545574	4.54789	-0.107636	0.457143	0.107636
Bacteroidetes	[Paraprevotellaceae]	[Prevotella]	0.297624	0.432026	0.309467	0.432582	-4.03587	-3.1746	-5.19333	-2.05695	4.37107	-0.397926	0.283854	0.397926
Proteobacteria	Rhodocyclaceae	Propionivibrio	0.551674	0.676229	0.558026	0.67859	-3.61783	-3.08585	-4.25995	-1.04645	5.15283	-0.192177	0.415584	0.192177
Verrucomicrobia	Verrucomicrobiaceae	Prosthecobacter	0.028219	0.111544	0.0282936	0.0979711	5.03459	2.97921	6.12692	3.17301	3.39485	0.860635	0.14323	0.860635
Cyanobacteria	Pseudanabaenaceae	Pseudanabaena	0.284677	0.430502	0.324362	0.472173	-3.2455	-3.75886	0.264097	3.06881	5.79718	0.480747	0.320313	0.480747
Proteobacteria	Pseudomonadaceae	Pseudomonas	2.66303e-05	0.00124834	0.0003996	0.00525407	13.7472	14.5306	11.7111	-2.93004	1.15142	-2.60564	0.000182733	2.60564
Actinobacteria	Pseudonocardiaceae	Pseudonocardia	0.319655	0.463257	0.338348	0.472481	-4.07575	-3.26785	-4.88247	-1.79745	4.62414	-0.357985	0.332468	0.357985
Proteobacteria	Xanthomonadaceae	Pseudoxanthomonas	0.85741	0.915962	0.895985	0.939566	6.34155	6.39553	6.14119	-0.14455	2.45738	-0.0674446	0.473958	0.0674446
Proteobacteria	[Chromatiaceae]	Rheinheimera	0.000875611	0.010762	0.000440185	0.00546214	11.9945	12.8267	10.0266	-2.94562	1.56453	-1.81612	0.00262346	1.81612
Proteobacteria	Rhodobacteraceae	Rhodobacter	0.0939903	0.239981	0.136229	0.285949	8.13972	7.66695	9.63727	1.52045	2.13473	0.659299	0.242188	0.659299
Actinobacteria	Nocardiaceae	Rhodococcus	0.340379	0.47468	0.362667	0.482276	-4.0215	-3.20745	-5.02136	-1.9016	4.93074	-0.38294	0.315104	0.38294
Proteobacteria	Comamonadaceae	Rhodoferax	0.00495271	0.0365624	0.00564123	0.0328846	8.16033	8.83758	7.35041	-1.45861	1.25047	-1.21659	0.08073	1.21659
Proteobacteria	Hyphomicrobiaceae	Rhodoplanes	0.000742692	0.00846738	0.00203234	0.0166935	-0.477955	-3.24676	3.58544	6.98398	3.63893	1.72182	0.0415601	1.72182
Proteobacteria	Rickettsiaceae	Rickettsia	0.283304	0.443239	0.243141	0.408381	-1.8959	-2.94435	1.34412	3.0449	5.83601	0.45678	0.302083	0.45678
Proteobacteria	Acetobacteraceae	Roseococcus	0.000358621	0.00468821	0.0003996	0.00525407	0.398055	-1.97826	3.97391	6.08135	2.65684	2.32458	0.000182733	2.32458
Actinobacteria	Micrococcaceae	Rothia	0.147127	0.262837	0.186204	0.303434	-3.73263	-2.10149	-5.16262	-3.64383	5.17991	-0.645975	0.233766	0.645975
Proteobacteria	Comamonadaceae	Rubrivivax	0.362887	0.548108	0.568697	0.711949	6.30426	6.10314	6.42119	0.362381	2.89364	0.0996697	0.427083	0.0996697
Firmicutes	Ruminococcaceae	Ruminococcus	0.39967	0.52674	0.378073	0.501729	-4.09715	-3.31469	-4.80899	-1.56886	4.43636	-0.328327	0.322917	0.328327
Bacteroidetes	Cytophagaceae	Runella	0.0143055	0.0679373	0.00109266	0.0102064	3.40453	5.85382	1.38678	-4.82434	3.83929	-1.3132	0.018233	1.3132
Actinobacteria	Microbacteriaceae	Salinibacterium	0.783226	0.864197	0.913664	0.947286	3.89821	3.6316	4.04904	-0.0147384	4.71457	-0.00202571	0.498701	0.00202571
Firmicutes	Staphylococcaceae	Salinicoccus	0.353381	0.485283	0.356072	0.485984	-3.94978	-3.13439	-5.0023	-1.91654	4.3436	-0.397999	0.322917	0.397999
Bacteroidetes	[Amoebophilaceae]	SC3-56	0.523174	0.648505	0.579781	0.697056	-3.56022	-3.66673	-3.26329	1.17873	5.0933	0.234694	0.414063	0.234694
Bacteroidetes	Chitinophagaceae	Sediminibacterium	0.145312	0.312099	0.181693	0.352865	7.46545	6.88484	7.88131	1.73415	3.29551	0.409049	0.283854	0.409049
SAR406	A714017	SGSH944	0.338045	0.479916	0.361375	0.492282	-3.93145	-3.26414	-4.83537	-1.7864	4.54911	-0.362893	0.327273	0.362893
Proteobacteria	Shewanellaceae	Shewanella	0.190279	0.320151	0.191685	0.315639	-3.59612	-2.42328	-5.14974	-2.89203	4.43492	-0.590435	0.244792	0.590435
Proteobacteria	Sphingomonadaceae	Sphingobium	0.00808931	0.0487476	0.00474838	0.0300385	4.30832	2.9562	6.11442	3.76872	2.82624	1.22031	0.08073	1.22031
Proteobacteria	Sphingomonadaceae	Sphingomonas	0.0180329	0.0838048	0.0169893	0.0692276	6.80353	6.56804	7.87408	1.31185	0.824133	1.44587	0.114584	1.44587
Proteobacteria	Sphingomonadaceae	Sphingopyxis	5.51451e-05	0.00138678	0.0003996	0.00525407	0.712659	-2.5748	6.34703	9.12426	3.65036	2.44992	0.000182733	2.44992
Spirochaetes	Spirochaetaceae	Spirochaeta	0.595521	0.71079	0.624095	0.734336	-3.97625	-3.82821	-4.29509	-0.272719	4.73138	-0.0734181	0.47013	0.0734181
Firmicutes	Staphylococcaceae	Staphylococcus	0.00408701	0.0288615	0.000402722	0.0052724	2.67296	4.71812	-3.47983	-7.83296	4.39654	-1.83234	0.00262346	1.83234
Proteobacteria	Xanthomonadaceae	Stenotrophomonas	0.266586	0.442106	0.255741	0.433359	1.75535	2.84843	0.1643	-3.88118	7.06062	-0.446402	0.299479	0.446402
Proteobacteria	Sinobacteraceae	Steroidobacter	0.281333	0.426668	0.276372	0.42609	-2.41291	-3.31036	0.00609327	2.56765	5.26301	0.4642	0.294271	0.4642
Firmicutes	Streptococcaceae	Streptococcus	0.462631	0.614233	0.53738	0.677914	-0.521563	-0.483006	-0.90954	-1.85328	6.21469	-0.275097	0.38961	0.275097
Actinobacteria	Streptomycetaceae	Streptomyces	0.334322	0.470795	0.347701	0.470746	-3.92657	-3.12768	-5.10194	-2.05939	4.77104	-0.382863	0.322078	0.382863
Proteobacteria	Rhodocyclaceae	Sulfuritalea	0.545314	0.675088	0.567251	0.690892	-3.87145	-3.52937	-4.31787	-0.514364	4.80864	-0.102047	0.444156	0.102047
Actinobacteria	Intrasporangiaceae	Terracoccus	0.335132	0.469897	0.357602	0.480748	-4.02247	-3.12992	-5.06524	-2.04185	4.75684	-0.375372	0.315104	0.375372
Proteobacteria	Rhodocyclaceae	Thauera	0.309297	0.448637	0.322292	0.452035	-3.89348	-3.21702	-4.95889	-1.85323	4.83512	-0.378386	0.332468	0.378386
Proteobacteria	Xanthomonadaceae	Thermomonas	0.636035	0.75216	0.714156	0.808611	-2.83065	-2.75447	-3.17423	-0.211188	6.52002	-0.0467623	0.488312	0.0467623
Actinobacteria	Tsukamurellaceae	Tsukamurella	0.288694	0.425425	0.311181	0.439016	-4.01797	-3.16957	-4.9719	-1.99137	4.48539	-0.400101	0.290909	0.400101
Firmicutes	Veillonellaceae	Veillonella	0.317643	0.462825	0.334731	0.465645	-4.00507	-3.24198	-4.95253	-1.81349	4.5703	-0.36017	0.304688	0.36017
Proteobacteria	Xanthobacteraceae	Xanthobacter	0.734388	0.825038	0.809589	0.878353	-0.181162	-0.940719	0.136789	0.521336	6.23142	0.0915579	0.454545	0.0915579
Proteobacteria	Rhodocyclaceae	Zoogloea	0.639699	0.763328	0.91546	0.949774	6.47077	6.55879	6.35979	-0.0299913	8.79502	-0.00650682	0.496104	0.00650682

## Sheet: W_vs_SD
Genus	Phylum	Family	we.ep	we.eBH	wi.ep	wi.eBH	rab.all	rab.win.SD_treated	rab.win.water_treated	diff.btw	diff.win	effect	overlap	absolute_effect
Achromobacter	Proteobacteria	Alcaligenaceae	0.670087	0.910283	0.705263	0.929382	-3.15944	-3.23991	-3.05534	-0.237654	6.32211	-0.0269364	0.482143	0.0269364
Acidovorax	Proteobacteria	Comamonadaceae	0.842152	0.957646	0.674182	0.932666	6.40709	7.00883	6.04864	-0.72272	8.8057	-0.0814513	0.416481	0.0814513
Acinetobacter	Proteobacteria	Moraxellaceae	0.609588	0.907282	0.77458	0.948285	5.17747	5.20864	5.10132	0.442869	5.16604	0.106978	0.438753	0.106978
Actinomyces	Actinobacteria	Actinomycetaceae	0.378058	0.805915	0.388491	0.838509	-3.6853	-2.87294	-4.35484	-1.8706	4.98317	-0.28944	0.367483	0.28944
Aerococcus	Firmicutes	Aerococcaceae	0.456643	0.832942	0.487434	0.867674	-4.09488	-3.65073	-4.61661	-1.35362	4.78161	-0.262316	0.383929	0.262316
Agrobacterium	Proteobacteria	Rhizobiaceae	0.850841	0.957951	0.809008	0.960032	7.03686	7.09555	6.74541	-0.223922	1.86282	-0.11907	0.452116	0.11907
Anaeromyxobacter	Proteobacteria	Myxococcaceae	0.367908	0.800824	0.415557	0.848618	-3.67228	-2.81744	-4.35761	-1.9928	5.22025	-0.334342	0.347439	0.334342
Ancylobacter	Proteobacteria	Xanthobacteraceae	0.557793	0.871869	0.613398	0.900492	-3.47889	-3.69446	-3.25031	0.261028	4.92888	0.0433734	0.482143	0.0433734
Arcobacter	Proteobacteria	Campylobacteraceae	0.558943	0.87095	0.577574	0.896923	-3.91888	-3.82883	-4.03954	-0.112391	4.63655	-0.0309337	0.483296	0.0309337
Asticcacaulis	Proteobacteria	Caulobacteraceae	0.379361	0.809397	0.451672	0.867768	-1.48268	-2.44267	1.23013	2.20563	6.20242	0.31617	0.376392	0.31617
Azospirillum	Proteobacteria	Rhodospirillaceae	0.222463	0.761091	0.232697	0.825262	4.89073	5.16745	4.44436	-0.770922	1.76003	-0.289743	0.292411	0.289743
Bacillus	Firmicutes	Bacillaceae	0.45602	0.856454	0.502224	0.896971	3.63543	4.25982	3.58536	-1.04306	3.47995	-0.265374	0.388393	0.265374
Bdellovibrio	Proteobacteria	Bdellovibrionaceae	0.112615	0.700387	0.105186	0.752957	0.981209	-1.49492	2.65149	3.51333	5.04228	0.65165	0.214286	0.65165
Bosea	Proteobacteria	Bradyrhizobiaceae	0.814243	0.959024	0.652898	0.929274	7.25564	7.4429	7.11972	-0.338361	1.3642	-0.195856	0.418708	0.195856
Bradyrhizobium	Proteobacteria	Bradyrhizobiaceae	0.502959	0.856999	0.528049	0.886572	-3.93261	-3.98384	-3.89419	0.153757	5.34869	0.0259903	0.486607	0.0259903
Brevundimonas	Proteobacteria	Caulobacteraceae	0.143067	0.730735	0.265982	0.83357	7.69839	8.14487	7.20604	-1.91079	3.51187	-0.565664	0.303572	0.565664
Burkholderia	Proteobacteria	Burkholderiaceae	0.573586	0.887942	0.790536	0.953516	3.01463	2.90114	3.32083	-0.181217	6.89565	-0.030809	0.465479	0.030809
C39	Proteobacteria	Rhodocyclaceae	0.307453	0.788445	0.327161	0.841049	0.778843	-2.08324	2.02198	1.94978	6.24617	0.357012	0.32294	0.357012
Caedibacter	Proteobacteria	Francisellaceae	0.107157	0.695313	0.188897	0.752008	-3.1088	-1.34583	-4.3286	-4.08748	7.51391	-0.574264	0.236607	0.574264
Candidatus Amoebophilus	Bacteroidetes	[Amoebophilaceae]	0.537005	0.869131	0.56756	0.895667	-3.92416	-4.16912	-3.79383	0.537368	4.66824	0.0894929	0.464286	0.0894929
Candidatus Protochlamydia	Chlamydiae	Parachlamydiaceae	0.483057	0.846744	0.495758	0.867678	-3.97156	-3.39518	-4.47605	-1.17412	4.49825	-0.210412	0.389755	0.210412
Capnocytophaga	Bacteroidetes	Flavobacteriaceae	0.447199	0.831896	0.498027	0.876648	-3.90883	-3.55386	-4.33456	-1.06745	4.32919	-0.211825	0.400891	0.211825
Caulobacter	Proteobacteria	Caulobacteraceae	0.888243	0.965722	0.78305	0.94901	9.8794	9.69125	9.99106	0.200972	1.67894	0.109021	0.444196	0.109021
Cellvibrio	Proteobacteria	Alteromonadaceae	0.755529	0.94549	0.692914	0.931956	11.3191	11.2822	11.4233	0.356104	2.703	0.151485	0.430804	0.151485
Chryseobacterium	Bacteroidetes	[Weeksellaceae]	0.629452	0.8955	0.696473	0.931264	-2.47554	-2.92726	-1.59755	0.57584	6.93077	0.111202	0.457589	0.111202
Comamonas	Proteobacteria	Comamonadaceae	0.357946	0.811588	0.736222	0.943125	3.01031	1.21318	5.24795	2.30859	8.2844	0.248277	0.441964	0.248277
Corynebacterium	Actinobacteria	Corynebacteriaceae	0.486951	0.853192	0.485947	0.882248	-1.35727	-0.29599	-1.78288	-2.32222	7.27754	-0.287576	0.378619	0.287576
Crenothrix	Proteobacteria	Crenotrichaceae	0.519275	0.859412	0.545604	0.891544	-3.65551	-3.44585	-3.86269	-0.509652	4.41046	-0.105682	0.45657	0.105682
Cryocola	Actinobacteria	Microbacteriaceae	0.476774	0.845366	0.504741	0.877327	-3.75309	-3.31005	-4.17271	-0.876285	4.63096	-0.186567	0.395089	0.186567
Cupriavidus	Proteobacteria	Oxalobacteraceae	0.435821	0.823356	0.511592	0.868867	-4.09174	-3.55955	-4.50278	-0.866746	5.33105	-0.142822	0.407572	0.142822
Curvibacter	Proteobacteria	Comamonadaceae	0.700391	0.92462	0.75504	0.943951	5.82144	4.2565	6.21699	1.21887	9.6396	0.130716	0.441964	0.130716
Cytophaga	Bacteroidetes	Cytophagaceae	0.206599	0.749188	0.373752	0.855101	4.34567	2.46144	4.52348	3.26975	6.98975	0.45324	0.348214	0.45324
Dechloromonas	Proteobacteria	Rhodocyclaceae	0.797118	0.945953	0.899278	0.973512	3.21947	4.08822	3.0424	0.172401	5.5261	0.0227809	0.493304	0.0227809
Devosia	Proteobacteria	Hyphomicrobiaceae	0.527393	0.87801	0.89125	0.973875	10.14	9.87491	10.3262	-0.286093	2.49985	-0.0790704	0.473214	0.0790704
Dokdonella	Proteobacteria	Xanthomonadaceae	0.6332	0.896857	0.648546	0.91595	-3.21243	-3.22977	-3.19824	0.196161	6.07302	0.0313869	0.481069	0.0313869
Emticicia	Bacteroidetes	Cytophagaceae	0.0501448	0.678473	0.0720498	0.729054	5.93051	5.18624	6.38424	1.65709	2.73421	0.599144	0.209354	0.599144
Enhydrobacter	Proteobacteria	Moraxellaceae	0.394405	0.813872	0.452913	0.862545	-3.93947	-3.28612	-4.56783	-1.71972	5.35251	-0.2877	0.368304	0.2877
Enterobacter	Proteobacteria	Enterobacteriaceae	0.452682	0.827049	0.493545	0.867623	-3.97123	-3.50393	-4.49736	-1.45699	4.62258	-0.246628	0.396437	0.246628
Erwinia	Proteobacteria	Enterobacteriaceae	0.285905	0.787431	0.20701	0.812345	1.35481	2.81005	-2.0761	-2.58371	7.22054	-0.359845	0.28125	0.359845
Fimbriimonas	Armatimonadetes	[Fimbriimonadaceae]	0.484442	0.840881	0.531902	0.874066	-3.87391	-3.46215	-4.2568	-1.10995	4.80354	-0.220156	0.389755	0.220156
Finegoldia	Firmicutes	[Tissierellaceae]	0.417958	0.815692	0.451196	0.842737	-3.63861	-3.03854	-4.18599	-1.71454	4.90644	-0.306528	0.372768	0.306528
Flavobacterium	Bacteroidetes	Flavobacteriaceae	0.0826787	0.693728	0.0660402	0.730545	8.60319	7.8199	9.65316	1.68155	1.97038	0.751829	0.211581	0.751829
Flectobacillus	Bacteroidetes	Cytophagaceae	0.054979	0.681495	0.0659941	0.726974	4.67523	4.10388	6.1126	2.78015	4.28595	0.597935	0.202673	0.597935
Fluviicola	Bacteroidetes	Cryomorphaceae	0.32608	0.803066	0.475379	0.886034	6.60316	5.5	6.77859	1.72225	7.17147	0.26027	0.383074	0.26027
Fusobacterium	Fusobacteria	Fusobacteriaceae	0.466308	0.84282	0.525556	0.884474	-3.98267	-3.55414	-4.39765	-1.18719	4.75249	-0.222494	0.407572	0.222494
Gemmata	Planctomycetes	Gemmataceae	0.391184	0.812726	0.444826	0.871081	0.993011	-1.42364	1.66629	2.18292	6.25634	0.335476	0.363839	0.335476
Gemmatimonas	Gemmatimonadetes	Gemmatimonadaceae	0.0449844	0.677364	0.143005	0.791232	2.58193	-1.75386	3.22052	5.15922	5.42791	0.816362	0.271715	0.816362
Geothrix	Acidobacteria	Holophagaceae	0.550258	0.870895	0.564198	0.897306	-3.96606	-3.98764	-3.95598	0.197715	4.90284	0.0401161	0.478842	0.0401161
Gordonia	Actinobacteria	Gordoniaceae	0.815671	0.954213	0.631776	0.921159	5.20157	4.71116	5.85628	0.626857	7.98576	0.082311	0.417411	0.082311
Granulicatella	Firmicutes	Carnobacteriaceae	0.471188	0.835415	0.496631	0.866331	-4.01331	-3.65839	-4.35244	-0.943562	4.53645	-0.170872	0.421875	0.170872
Haemophilus	Proteobacteria	Pasteurellaceae	0.237406	0.736139	0.331921	0.812756	-3.51904	-2.47609	-4.387	-3.23633	5.78755	-0.475192	0.302895	0.475192
Halomonas	Proteobacteria	Halomonadaceae	0.539252	0.868915	0.585131	0.904167	-3.57229	-3.48502	-3.63906	-0.360357	5.14481	-0.0540398	0.463252	0.0540398
Hydrogenophaga	Proteobacteria	Comamonadaceae	0.268364	0.77962	0.313226	0.839122	8.01936	6.90031	8.33621	1.07025	3.05636	0.374212	0.334822	0.374212
Hydrogenophilus	Proteobacteria	Rhodocyclaceae	0.542064	0.873426	0.597881	0.908018	-3.90405	-3.94066	-3.82648	0.288037	4.61492	0.0445613	0.475446	0.0445613
Hyphomicrobium	Proteobacteria	Hyphomicrobiaceae	0.349778	0.806876	0.263435	0.823846	4.24336	3.96613	4.6569	2.49179	5.2645	0.34478	0.319197	0.34478
Inquilinus	Proteobacteria	Rhodospirillaceae	0.450894	0.831954	0.467914	0.852258	-3.96845	-3.37696	-4.5826	-1.26487	4.79996	-0.262362	0.389755	0.262362
Janthinobacterium	Proteobacteria	Oxalobacteraceae	0.919934	0.978397	0.927829	0.981931	10.3357	10.4745	9.61723	-0.076075	4.23122	-0.0200347	0.488839	0.0200347
Kaistia	Proteobacteria	Rhizobiaceae	0.480534	0.851765	0.504412	0.888026	0.965032	-1.60379	1.7615	1.85442	6.62337	0.28212	0.385301	0.28212
Kocuria	Actinobacteria	Micrococcaceae	0.495247	0.846472	0.532454	0.886095	-4.10105	-3.8852	-4.32001	-0.701472	5.36144	-0.118105	0.436526	0.118105
Lactobacillus	Firmicutes	Lactobacillaceae	0.419548	0.812191	0.454043	0.850382	-3.84785	-3.17025	-4.46286	-1.52126	5.03691	-0.287213	0.369711	0.287213
Leadbetterella	Bacteroidetes	Cytophagaceae	0.657964	0.899915	0.68851	0.926148	-2.61763	-2.38482	-2.75554	0.0394605	5.14909	0.00741804	0.498886	0.00741804
Legionella	Proteobacteria	Legionellaceae	0.397535	0.801347	0.425986	0.84777	-3.86324	-3.24091	-4.47702	-1.38926	4.82702	-0.254418	0.363029	0.254418
Limnohabitans	Proteobacteria	Comamonadaceae	0.457201	0.854841	0.384205	0.868354	10.2662	10.6209	9.99138	-0.541342	2.05065	-0.271346	0.345212	0.271346
Luteibacter	Proteobacteria	Xanthomonadaceae	0.378144	0.81398	0.382037	0.857064	0.713155	1.7905	-2.01473	-2.46069	7.01963	-0.343364	0.361607	0.343364
Luteolibacter	Verrucomicrobia	Verrucomicrobiaceae	0.614579	0.895497	0.701054	0.93035	-2.74019	-2.79798	-2.7097	0.300507	4.99455	0.0490543	0.483296	0.0490543
Lysinibacillus	Firmicutes	Planococcaceae	0.461912	0.833318	0.514252	0.872295	-4.13906	-3.75792	-4.53055	-0.94763	5.54575	-0.15039	0.417411	0.15039
Mesorhizobium	Proteobacteria	Phyllobacteriaceae	0.433026	0.849474	0.548745	0.904853	10.9922	11.7074	10.7153	-0.7423	2.11955	-0.290332	0.408482	0.290332
Methylibium	Proteobacteria	Comamonadaceae	0.0819707	0.697048	0.106755	0.757548	6.53808	5.23042	7.00868	1.7389	3.35775	0.421854	0.245536	0.421854
Methylobacterium	Proteobacteria	Methylobacteriaceae	0.319303	0.789602	0.372861	0.844033	-2.67074	-3.60352	-1.46274	2.82031	7.4034	0.385254	0.325893	0.385254
Methylophaga	Proteobacteria	Piscirickettsiaceae	0.44436	0.822397	0.483553	0.858988	-4.01258	-3.65518	-4.42995	-1.14959	4.66976	-0.196339	0.404018	0.196339
Methylotenera	Proteobacteria	Methylophilaceae	0.628714	0.90005	0.569582	0.90068	-3.74961	-3.58361	-3.97831	-0.323881	6.75671	-0.0357106	0.478842	0.0357106
Methyloversatilis	Proteobacteria	Rhodocyclaceae	0.783711	0.943432	0.836773	0.961306	4.24095	2.83503	4.91585	0.152329	8.6757	0.0180798	0.488839	0.0180798
Modestobacter	Actinobacteria	Geodermatophilaceae	0.448906	0.830536	0.496034	0.873121	-3.92709	-3.49019	-4.31312	-1.21088	5.39188	-0.199889	0.386161	0.199889
Mycobacterium	Actinobacteria	Mycobacteriaceae	0.621006	0.891927	0.698757	0.929382	-2.71607	-2.92538	-2.30954	1.13636	7.35419	0.151138	0.435268	0.151138
Mycoplana	Proteobacteria	Caulobacteraceae	0.0430546	0.676451	0.05338	0.716326	9.36717	8.40661	9.84591	1.28352	1.362	0.735382	0.180401	0.735382
Nevskia	Proteobacteria	Sinobacteraceae	0.0582553	0.682596	0.0650884	0.726542	6.37285	4.55279	6.74357	2.60386	3.04628	0.689458	0.191964	0.689458
Nitrospira	Nitrospirae	Nitrospiraceae	0.395026	0.816955	0.471834	0.866855	-2.33787	-1.76902	-2.93584	-1.77286	5.6937	-0.295151	0.388393	0.295151
Novosphingobium	Proteobacteria	Sphingomonadaceae	0.654077	0.90664	0.330213	0.841499	4.88939	3.58874	5.63971	1.07966	3.18502	0.22662	0.332589	0.22662
Opitutus	Verrucomicrobia	Opitutaceae	0.217555	0.755592	0.336012	0.847325	3.15211	2.8531	3.7802	1.94546	5.56383	0.342748	0.337054	0.342748
Paenibacillus	Firmicutes	Paenibacillaceae	0.654636	0.901596	0.672823	0.922324	-2.55608	-2.9669	-1.92051	0.885333	5.67639	0.139307	0.453125	0.139307
Paracoccus	Proteobacteria	Rhodobacteraceae	0.556175	0.875597	0.588012	0.903805	-3.56866	-3.4092	-3.81675	-0.450481	5.51736	-0.0771	0.46875	0.0771
Parvibaculum	Proteobacteria	Hyphomicrobiaceae	0.385464	0.810102	0.36099	0.835272	-1.63245	-2.57468	-0.638768	1.31697	4.0744	0.289247	0.310268	0.289247
Pedobacter	Bacteroidetes	Sphingobacteriaceae	0.334026	0.788594	0.407677	0.847349	-2.90151	-1.84492	-3.72326	-2.72217	6.60807	-0.366622	0.35412	0.366622
Pedomicrobium	Proteobacteria	Hyphomicrobiaceae	0.529195	0.865239	0.639337	0.916267	-1.67961	-2.43318	0.398768	1.81447	5.56515	0.26812	0.407572	0.26812
Pedosphaera	Verrucomicrobia	[Pedosphaeraceae]	0.179284	0.734791	0.291645	0.802175	-3.47143	-2.51031	-4.60068	-2.69909	6.48141	-0.387308	0.287305	0.387308
Perlucidibaca	Proteobacteria	Moraxellaceae	0.186249	0.747914	0.248907	0.825556	6.14767	5.7247	7.50199	1.54905	4.00432	0.308879	0.32294	0.308879
Phaeospirillum	Proteobacteria	Rhodospirillaceae	0.518631	0.855826	0.542603	0.89537	-3.25966	-3.44543	-3.0207	0.795827	4.5319	0.15302	0.427617	0.15302
Phenylobacterium	Proteobacteria	Caulobacteraceae	0.838668	0.956888	0.853835	0.965145	7.26982	7.22098	7.29875	0.0552789	1.1769	0.0411473	0.482143	0.0411473
Phormidium	Cyanobacteria	Phormidiaceae	0.336901	0.797548	0.382742	0.837942	-2.82901	-1.67115	-3.9061	-2.62625	8.27335	-0.339884	0.320713	0.339884
Phycicoccus	Actinobacteria	Intrasporangiaceae	0.393388	0.808796	0.417727	0.84849	-3.88116	-3.22878	-4.55004	-1.3333	4.91334	-0.281196	0.372768	0.281196
Phyllobacterium	Proteobacteria	Phyllobacteriaceae	0.617011	0.896452	0.656414	0.920069	-2.8985	-2.7148	-3.172	-0.162031	6.65756	-0.0308026	0.479911	0.0308026
Pirellula	Planctomycetes	Pirellulaceae	0.49918	0.852006	0.547861	0.895174	-3.1783	-3.36834	-2.88568	1.02185	5.19607	0.160682	0.418708	0.160682
Planctomyces	Planctomycetes	Planctomycetaceae	0.496345	0.861727	0.420659	0.868588	2.47693	0.82004	2.86947	1.28018	7.93602	0.219669	0.342984	0.219669
Polaromonas	Proteobacteria	Comamonadaceae	0.345853	0.800957	0.349137	0.839585	-1.59643	-3.06522	2.29983	3.29846	7.0774	0.396561	0.325167	0.396561
Polynucleobacter	Proteobacteria	Oxalobacteraceae	0.413329	0.833128	0.508885	0.895979	5.04413	4.2064	5.19913	1.13547	1.97631	0.42658	0.380846	0.42658
Pontibacter	Bacteroidetes	Cytophagaceae	0.410597	0.819377	0.438877	0.865291	-3.85418	-3.3291	-4.41255	-0.986891	4.08344	-0.225528	0.383929	0.225528
[Prevotella]	Bacteroidetes	[Paraprevotellaceae]	0.519598	0.861558	0.547864	0.895428	-3.94508	-4.06137	-3.75	0.296194	4.60454	0.0656813	0.46875	0.0656813
Propionivibrio	Proteobacteria	Rhodocyclaceae	0.592256	0.887032	0.60138	0.905204	-3.65384	-3.38865	-3.97595	-0.399108	5.24315	-0.0670375	0.464286	0.0670375
Prosthecobacter	Verrucomicrobia	Verrucomicrobiaceae	0.141594	0.73062	0.201056	0.807402	5.0104	3.16182	5.71861	2.64562	4.50241	0.439471	0.294643	0.439471
Pseudanabaena	Cyanobacteria	Pseudanabaenaceae	0.471462	0.844524	0.511039	0.884249	-3.13763	-2.42127	-3.90969	-1.72825	6.3397	-0.243256	0.385301	0.243256
Pseudomonas	Proteobacteria	Pseudomonadaceae	0.840897	0.95715	0.856682	0.965173	13.7498	14.0533	13.0639	0.248709	2.79224	0.101979	0.463252	0.101979
Pseudonocardia	Actinobacteria	Pseudonocardiaceae	0.506605	0.854821	0.563043	0.892859	-4.04524	-4.04042	-4.04524	0.0675693	5.08744	0.0119672	0.491071	0.0119672
Pseudoxanthomonas	Proteobacteria	Xanthomonadaceae	0.771833	0.946541	0.849519	0.964702	6.34414	6.61704	6.22923	-0.186379	2.21777	-0.0717042	0.463252	0.0717042
Rheinheimera	Proteobacteria	[Chromatiaceae]	0.657678	0.920969	0.743708	0.944931	11.9799	12.2687	11.7267	-0.322078	2.50327	-0.124163	0.439732	0.124163
Rhodobacter	Proteobacteria	Rhodobacteraceae	0.250832	0.769999	0.219658	0.813225	8.16626	7.74398	9.84246	1.23095	2.13235	0.568086	0.301339	0.568086
Rhodococcus	Actinobacteria	Nocardiaceae	0.455438	0.839027	0.51669	0.873794	-3.94128	-3.4758	-4.49213	-1.13507	5.20342	-0.193512	0.405345	0.193512
Rhodoferax	Proteobacteria	Comamonadaceae	0.347043	0.808476	0.489875	0.883072	8.16781	7.90203	8.63908	0.512298	1.75571	0.277398	0.367483	0.277398
Rhodoplanes	Proteobacteria	Hyphomicrobiaceae	0.456819	0.845192	0.323295	0.837172	-0.700965	-1.4948	2.79762	2.10059	6.79783	0.320027	0.327394	0.320027
Rickettsia	Proteobacteria	Rickettsiaceae	0.422045	0.828813	0.45907	0.876693	-1.5802	0.0806257	-2.88523	-2.29816	6.41009	-0.318685	0.367483	0.318685
Roseococcus	Proteobacteria	Acetobacteraceae	0.66313	0.908562	0.789524	0.950018	0.394264	-0.543139	0.933053	0.617591	6.36933	0.0888303	0.466518	0.0888303
Rothia	Actinobacteria	Micrococcaceae	0.249037	0.745461	0.296756	0.792516	-3.5037	-2.08307	-4.34669	-2.76277	5.29867	-0.467574	0.299107	0.467574
Rubrivivax	Proteobacteria	Comamonadaceae	0.0621168	0.681562	0.0386874	0.715184	6.30859	5.13796	7.23854	1.83923	2.5794	0.625584	0.174107	0.625584
Ruminococcus	Firmicutes	Ruminococcaceae	0.501394	0.855958	0.553262	0.891802	-3.86237	-3.97599	-3.6666	0.145873	4.18037	0.0318992	0.482143	0.0318992
Runella	Bacteroidetes	Cytophagaceae	0.768783	0.943892	0.794285	0.955035	3.44104	4.09506	3.2283	-0.586175	5.25347	-0.077516	0.450893	0.077516
Salinibacterium	Actinobacteria	Microbacteriaceae	0.141816	0.728187	0.355441	0.849408	3.91038	3.36173	4.21904	1.01833	3.70034	0.269696	0.339286	0.269696
Salinicoccus	Firmicutes	Staphylococcaceae	0.5595	0.879216	0.588015	0.899024	-4.07617	-4.01068	-4.11802	-0.014843	4.95569	-0.00248039	0.496659	0.00248039
SC3-56	Bacteroidetes	[Amoebophilaceae]	0.284758	0.76966	0.262271	0.796223	-3.41964	-2.32934	-4.41238	-2.2904	4.72859	-0.452694	0.289532	0.452694
Sediminibacterium	Bacteroidetes	Chitinophagaceae	0.148418	0.732748	0.261376	0.826646	7.46973	5.71872	7.67405	2.09612	3.63794	0.409601	0.332589	0.409601
SGSH944	SAR406	A714017	0.45624	0.835709	0.505166	0.875227	-4.02585	-3.61707	-4.37158	-1.07122	4.81594	-0.183064	0.400891	0.183064
Shewanella	Proteobacteria	Shewanellaceae	0.605298	0.889228	0.669311	0.926122	-3.77343	-3.71087	-3.81878	0.164983	5.08258	0.0243472	0.484375	0.0243472
Sphingobium	Proteobacteria	Sphingomonadaceae	0.810883	0.95426	0.836592	0.960876	4.2935	4.95944	3.9288	0.641603	4.6017	0.0827583	0.458797	0.0827583
Sphingomonas	Proteobacteria	Sphingomonadaceae	0.402663	0.823501	0.321749	0.834738	6.82944	6.57398	7.1869	0.418824	1.13946	0.375643	0.305123	0.375643
Sphingopyxis	Proteobacteria	Sphingomonadaceae	0.762518	0.939457	0.753653	0.941687	0.701633	1.17823	0.64338	0.650515	8.88344	0.0663773	0.458797	0.0663773
Spirochaeta	Spirochaetes	Spirochaetaceae	0.459353	0.827406	0.473047	0.862192	-4.00136	-3.42013	-4.62473	-1.24438	4.41486	-0.23346	0.392857	0.23346
Staphylococcus	Firmicutes	Staphylococcaceae	0.692318	0.921162	0.608112	0.914262	2.66549	2.75212	2.52267	-1.61109	7.03042	-0.201908	0.415179	0.201908
Stenotrophomonas	Proteobacteria	Xanthomonadaceae	0.325227	0.795492	0.205296	0.812663	1.79008	3.23818	0.889842	-3.46379	7.10544	-0.430858	0.287305	0.430858
Steroidobacter	Proteobacteria	Sinobacteraceae	0.563008	0.874586	0.562751	0.897452	-2.32097	-1.48516	-3.03111	-1.40768	5.65761	-0.243181	0.400891	0.243181
Streptococcus	Firmicutes	Streptococcaceae	0.287053	0.7761	0.268264	0.818401	-0.592778	0.506869	-2.18491	-2.86992	5.56766	-0.470232	0.308036	0.470232
Streptomyces	Actinobacteria	Streptomycetaceae	0.435325	0.831947	0.48243	0.874872	-3.99909	-3.58147	-4.38868	-1.10688	5.12348	-0.217583	0.40625	0.217583
Sulfuritalea	Proteobacteria	Rhodocyclaceae	0.430417	0.819862	0.443098	0.848501	-4.03771	-3.52243	-4.56562	-1.13623	4.61355	-0.209528	0.390625	0.209528
Terracoccus	Actinobacteria	Intrasporangiaceae	0.494062	0.849232	0.518228	0.883332	-4.10747	-3.67787	-4.4387	-1.05784	4.85714	-0.209739	0.392857	0.209739
Thauera	Proteobacteria	Rhodocyclaceae	0.530144	0.866633	0.55156	0.895462	-3.96486	-4.05969	-3.83896	0.393355	5.30972	0.066112	0.475446	0.066112
Thermomonas	Proteobacteria	Xanthomonadaceae	0.637708	0.901564	0.689169	0.931862	-2.95387	-2.6065	-3.21239	-0.481887	6.08937	-0.0855127	0.464286	0.0855127
Tsukamurella	Actinobacteria	Tsukamurellaceae	0.528135	0.861903	0.571714	0.899815	-3.85242	-3.93461	-3.7374	0.569381	4.99161	0.104436	0.455357	0.104436
Veillonella	Firmicutes	Veillonellaceae	0.443905	0.830086	0.482797	0.863293	-3.89094	-3.47897	-4.30673	-1.11913	4.43001	-0.179765	0.412027	0.179765
Xanthobacter	Proteobacteria	Xanthobacteraceae	0.572621	0.882645	0.693568	0.93199	-0.175354	-2.11265	0.499527	1.55321	6.13763	0.251888	0.424107	0.251888
Zoogloea	Proteobacteria	Rhodocyclaceae	0.46607	0.851988	0.629912	0.918535	6.45165	6.33635	6.58189	1.00002	8.63861	0.123035	0.412946	0.123035
